# Supplementary material
Source: PubMed Central journal article supplement (PMC9106320)

# THE LANCET

## Infectious Diseases

### Supplementary appendix

This appendix formed part of the original submission and has been peer reviewed. We post it as supplied by the authors.

Supplement to: Burn E, Duarte-Salles T, Fernandez-Bertolin S, et al. Venous or arterial thrombosis and deaths among COVID-19 cases: a European network cohort study. *Lancet Infect Dis* 2022; published online May 13. [https://doi.org/10.1016/S1473-3099\(22\)00223-7](https://doi.org/10.1016/S1473-3099(22)00223-7).

## Supplementary Figure 1. Multistate model

All study participants start in the “General population” state, from which they can transition to other states in the model over time. To model the impact of VTE/ ATE, their occurrence was treated as a time dependent exposure.

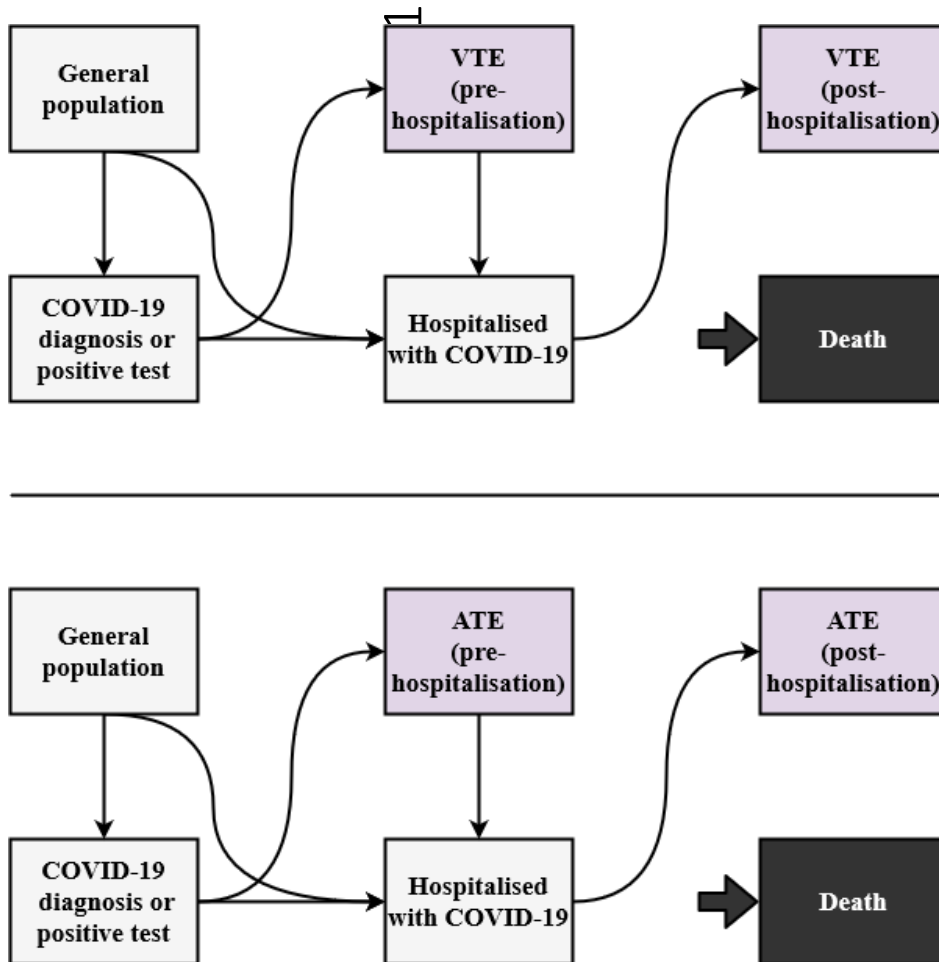

Supplementary Table 1. Cumulative incidence of study outcomes by age and sex strata

| Database         | Outcome | Time | Strata                  | Number at risk | Events | Cumulative incidence   |
|------------------|---------|------|-------------------------|----------------|--------|------------------------|
| IQVIA DA Germany | ATE     | 0    | Age: <=44; Sex: Male    | 6,123          | <5     |                        |
| IQVIA DA Germany | ATE     | 30   | Age: <=44; Sex: Male    | 3,797          | <5     |                        |
| IQVIA DA Germany | ATE     | 60   | Age: <=44; Sex: Male    | 2,910          | <5     |                        |
| IQVIA DA Germany | ATE     | 90   | Age: <=44; Sex: Male    | 2,123          | <5     |                        |
| IQVIA DA Germany | ATE     | 0    | Age: <=44; Sex: Female  | 6,966          | <5     |                        |
| IQVIA DA Germany | ATE     | 30   | Age: <=44; Sex: Female  | 4,859          | <5     |                        |
| IQVIA DA Germany | ATE     | 60   | Age: <=44; Sex: Female  | 3,933          | <5     |                        |
| IQVIA DA Germany | ATE     | 90   | Age: <=44; Sex: Female  | 2,994          | <5     |                        |
| IQVIA DA Germany | ATE     | 0    | Age: 45-64; Sex: Male   | 5,147          | <5     |                        |
| IQVIA DA Germany | ATE     | 30   | Age: 45-64; Sex: Male   | 4,117          | <5     |                        |
| IQVIA DA Germany | ATE     | 60   | Age: 45-64; Sex: Male   | 3,499          | 6      | 0.14% (0.03% to 0.26%) |
| IQVIA DA Germany | ATE     | 90   | Age: 45-64; Sex: Male   | 2,974          | 9      | 0.23% (0.08% to 0.39%) |
| IQVIA DA Germany | ATE     | 0    | Age: 45-64; Sex: Female | 6,463          | <5     |                        |
| IQVIA DA Germany | ATE     | 30   | Age: 45-64; Sex: Female | 5,327          | <5     |                        |
| IQVIA DA Germany | ATE     | 60   | Age: 45-64; Sex: Female | 4,593          | <5     |                        |
| IQVIA DA Germany | ATE     | 90   | Age: 45-64; Sex: Female | 3,856          | <5     |                        |
| IQVIA DA Germany | ATE     | 0    | Age: >=65; Sex: Male    | 2,647          | <5     |                        |
| IQVIA DA Germany | ATE     | 30   | Age: >=65; Sex: Male    | 2,456          | <5     |                        |
| IQVIA DA Germany | ATE     | 60   | Age: >=65; Sex: Male    | 2,261          | 9      | 0.37% (0.13% to 0.61%) |
| IQVIA DA Germany | ATE     | 90   | Age: >=65; Sex: Male    | 1,952          | 12     | 0.51% (0.22% to 0.79%) |
| IQVIA DA Germany | ATE     | 0    | Age: >=65; Sex: Female  | 4,054          | <5     |                        |
| IQVIA DA Germany | ATE     | 30   | Age: >=65; Sex: Female  | 3,800          | 8      | 0.20% (0.06% to 0.34%) |
| IQVIA DA Germany | ATE     | 60   | Age: >=65; Sex: Female  | 3,521          | 13     | 0.33% (0.15% to 0.52%) |
| IQVIA DA Germany | ATE     | 90   | Age: >=65; Sex: Female  | 3,122          | 16     | 0.42% (0.22% to 0.63%) |
| IQVIA DA Germany | VTE     | 0    | Age: <=44; Sex: Male    | 6,122          | <5     |                        |
| IQVIA DA Germany | VTE     | 30   | Age: <=44; Sex: Male    | 3,793          | 5      | 0.11% (0.01% to 0.20%) |
| IQVIA DA Germany | VTE     | 60   | Age: <=44; Sex: Male    | 2,907          | 9      | 0.22% (0.08% to 0.37%) |

|                  |     |    |                         |         |    |                        |
|------------------|-----|----|-------------------------|---------|----|------------------------|
| IQVIA DA Germany | VTE | 90 | Age: <=44; Sex: Male    | 2,118   | 9  | 0.22% (0.08% to 0.37%) |
| IQVIA DA Germany | VTE | 0  | Age: <=44; Sex: Female  | 6,953   | <5 |                        |
| IQVIA DA Germany | VTE | 30 | Age: <=44; Sex: Female  | 4,841   | 8  | 0.14% (0.04% to 0.24%) |
| IQVIA DA Germany | VTE | 60 | Age: <=44; Sex: Female  | 3,915   | 9  | 0.17% (0.06% to 0.28%) |
| IQVIA DA Germany | VTE | 90 | Age: <=44; Sex: Female  | 2,979   | 11 | 0.22% (0.09% to 0.36%) |
| IQVIA DA Germany | VTE | 0  | Age: 45-64; Sex: Male   | 5,171   | <5 |                        |
| IQVIA DA Germany | VTE | 30 | Age: 45-64; Sex: Male   | 4,137   | 10 | 0.21% (0.08% to 0.35%) |
| IQVIA DA Germany | VTE | 60 | Age: 45-64; Sex: Male   | 3,514   | 16 | 0.37% (0.19% to 0.55%) |
| IQVIA DA Germany | VTE | 90 | Age: 45-64; Sex: Male   | 2,985   | 17 | 0.40% (0.21% to 0.59%) |
| IQVIA DA Germany | VTE | 0  | Age: 45-64; Sex: Female | 6,448   | <5 |                        |
| IQVIA DA Germany | VTE | 30 | Age: 45-64; Sex: Female | 5,297   | 21 | 0.35% (0.20% to 0.50%) |
| IQVIA DA Germany | VTE | 60 | Age: 45-64; Sex: Female | 4,565   | 29 | 0.51% (0.33% to 0.70%) |
| IQVIA DA Germany | VTE | 90 | Age: 45-64; Sex: Female | 3,825   | 34 | 0.63% (0.42% to 0.85%) |
| IQVIA DA Germany | VTE | 0  | Age: >=65; Sex: Male    | 2,703   | <5 |                        |
| IQVIA DA Germany | VTE | 30 | Age: >=65; Sex: Male    | 2,509   | 6  | 0.23% (0.05% to 0.41%) |
| IQVIA DA Germany | VTE | 60 | Age: >=65; Sex: Male    | 2,315   | 10 | 0.40% (0.15% to 0.64%) |
| IQVIA DA Germany | VTE | 90 | Age: >=65; Sex: Male    | 1,995   | 11 | 0.44% (0.18% to 0.70%) |
| IQVIA DA Germany | VTE | 0  | Age: >=65; Sex: Female  | 4,088   | <5 |                        |
| IQVIA DA Germany | VTE | 30 | Age: >=65; Sex: Female  | 3,827   | 16 | 0.41% (0.21% to 0.60%) |
| IQVIA DA Germany | VTE | 60 | Age: >=65; Sex: Female  | 3,545   | 24 | 0.62% (0.37% to 0.87%) |
| IQVIA DA Germany | VTE | 90 | Age: >=65; Sex: Female  | 3,150   | 28 | 0.74% (0.47% to 1.01%) |
| CPRD AURUM       | ATE | 0  | Age: <=44; Sex: Male    | 97,118  | <5 |                        |
| CPRD AURUM       | ATE | 30 | Age: <=44; Sex: Male    | 73,541  | <5 |                        |
| CPRD AURUM       | ATE | 60 | Age: <=44; Sex: Male    | 37,800  | <5 |                        |
| CPRD AURUM       | ATE | 90 | Age: <=44; Sex: Male    | 25,172  | <5 |                        |
| CPRD AURUM       | ATE | 0  | Age: <=44; Sex: Female  | 124,759 | <5 |                        |
| CPRD AURUM       | ATE | 30 | Age: <=44; Sex: Female  | 94,507  | 5  | 0.00% (0.01% to 0.00%) |
| CPRD AURUM       | ATE | 60 | Age: <=44; Sex: Female  | 48,563  | 5  | 0.00% (0.01% to 0.00%) |
| CPRD AURUM       | ATE | 90 | Age: <=44; Sex: Female  | 30,720  | 5  | 0.00% (0.01% to 0.00%) |
| CPRD AURUM       | ATE | 0  | Age: 45-64; Sex: Male   | 67,844  | <5 |                        |

|            |     |    |                         |         |     |                        |
|------------|-----|----|-------------------------|---------|-----|------------------------|
| CPRD AURUM | ATE | 30 | Age: 45-64; Sex: Male   | 49,164  | 25  | 0.04% (0.06% to 0.03%) |
| CPRD AURUM | ATE | 60 | Age: 45-64; Sex: Male   | 24,676  | 40  | 0.08% (0.11% to 0.06%) |
| CPRD AURUM | ATE | 90 | Age: 45-64; Sex: Male   | 14,998  | 48  | 0.12% (0.17% to 0.09%) |
| CPRD AURUM | ATE | 0  | Age: 45-64; Sex: Female | 77,183  | <5  |                        |
| CPRD AURUM | ATE | 30 | Age: 45-64; Sex: Female | 56,430  | 18  | 0.02% (0.04% to 0.02%) |
| CPRD AURUM | ATE | 60 | Age: 45-64; Sex: Female | 28,540  | 21  | 0.03% (0.05% to 0.02%) |
| CPRD AURUM | ATE | 90 | Age: 45-64; Sex: Female | 17,099  | 22  | 0.04% (0.06% to 0.02%) |
| CPRD AURUM | ATE | 0  | Age: >=65; Sex: Male    | 27,279  | <5  |                        |
| CPRD AURUM | ATE | 30 | Age: >=65; Sex: Male    | 14,988  | 42  | 0.16% (0.22% to 0.12%) |
| CPRD AURUM | ATE | 60 | Age: >=65; Sex: Male    | 7,737   | 55  | 0.26% (0.34% to 0.19%) |
| CPRD AURUM | ATE | 90 | Age: >=65; Sex: Male    | 4,609   | 56  | 0.27% (0.36% to 0.20%) |
| CPRD AURUM | ATE | 0  | Age: >=65; Sex: Female  | 32,277  | <5  |                        |
| CPRD AURUM | ATE | 30 | Age: >=65; Sex: Female  | 17,914  | 17  | 0.06% (0.09% to 0.04%) |
| CPRD AURUM | ATE | 60 | Age: >=65; Sex: Female  | 8,863   | 30  | 0.15% (0.22% to 0.10%) |
| CPRD AURUM | ATE | 90 | Age: >=65; Sex: Female  | 5,058   | 31  | 0.16% (0.23% to 0.11%) |
| CPRD AURUM | VTE | 0  | Age: <=44; Sex: Male    | 97,049  | <5  |                        |
| CPRD AURUM | VTE | 30 | Age: <=44; Sex: Male    | 73,451  | 65  | 0.07% (0.09% to 0.06%) |
| CPRD AURUM | VTE | 60 | Age: <=44; Sex: Male    | 37,753  | 73  | 0.09% (0.11% to 0.07%) |
| CPRD AURUM | VTE | 90 | Age: <=44; Sex: Male    | 25,149  | 73  | 0.09% (0.11% to 0.07%) |
| CPRD AURUM | VTE | 0  | Age: <=44; Sex: Female  | 124,632 | <5  |                        |
| CPRD AURUM | VTE | 30 | Age: <=44; Sex: Female  | 94,366  | 66  | 0.06% (0.07% to 0.04%) |
| CPRD AURUM | VTE | 60 | Age: <=44; Sex: Female  | 48,498  | 71  | 0.06% (0.08% to 0.05%) |
| CPRD AURUM | VTE | 90 | Age: <=44; Sex: Female  | 30,676  | 73  | 0.07% (0.09% to 0.05%) |
| CPRD AURUM | VTE | 0  | Age: 45-64; Sex: Male   | 67,870  | <5  |                        |
| CPRD AURUM | VTE | 30 | Age: 45-64; Sex: Male   | 49,021  | 240 | 0.38% (0.44% to 0.34%) |
| CPRD AURUM | VTE | 60 | Age: 45-64; Sex: Male   | 24,618  | 274 | 0.48% (0.54% to 0.42%) |
| CPRD AURUM | VTE | 90 | Age: 45-64; Sex: Male   | 14,975  | 283 | 0.52% (0.59% to 0.46%) |
| CPRD AURUM | VTE | 0  | Age: 45-64; Sex: Female | 77,078  | <5  |                        |
| CPRD AURUM | VTE | 30 | Age: 45-64; Sex: Female | 56,284  | 111 | 0.16% (0.19% to 0.13%) |
| CPRD AURUM | VTE | 60 | Age: 45-64; Sex: Female | 28,468  | 130 | 0.21% (0.25% to 0.17%) |

|            |     |    |                         |        |     |                        |
|------------|-----|----|-------------------------|--------|-----|------------------------|
| CPRD AURUM | VTE | 90 | Age: 45-64; Sex: Female | 17,049 | 133 | 0.22% (0.26% to 0.18%) |
| CPRD AURUM | VTE | 0  | Age: >=65; Sex: Male    | 27,431 | <5  |                        |
| CPRD AURUM | VTE | 30 | Age: >=65; Sex: Male    | 15,022 | 136 | 0.53% (0.63% to 0.45%) |
| CPRD AURUM | VTE | 60 | Age: >=65; Sex: Male    | 7,748  | 171 | 0.77% (0.90% to 0.66%) |
| CPRD AURUM | VTE | 90 | Age: >=65; Sex: Male    | 4,601  | 181 | 0.87% (1.02% to 0.75%) |
| CPRD AURUM | VTE | 0  | Age: >=65; Sex: Female  | 32,149 | <5  |                        |
| CPRD AURUM | VTE | 30 | Age: >=65; Sex: Female  | 17,765 | 149 | 0.50% (0.59% to 0.43%) |
| CPRD AURUM | VTE | 60 | Age: >=65; Sex: Female  | 8,758  | 176 | 0.65% (0.76% to 0.56%) |
| CPRD AURUM | VTE | 90 | Age: >=65; Sex: Female  | 5,003  | 187 | 0.76% (0.89% to 0.65%) |
| IPCI       | ATE | 0  | Age: <=44; Sex: Male    | 7,988  | <5  |                        |
| IPCI       | ATE | 30 | Age: <=44; Sex: Male    | 5,656  | <5  |                        |
| IPCI       | ATE | 60 | Age: <=44; Sex: Male    | 3,700  | <5  |                        |
| IPCI       | ATE | 90 | Age: <=44; Sex: Male    | 1,601  | <5  |                        |
| IPCI       | ATE | 0  | Age: <=44; Sex: Female  | 10,437 | <5  |                        |
| IPCI       | ATE | 30 | Age: <=44; Sex: Female  | 7,365  | <5  |                        |
| IPCI       | ATE | 60 | Age: <=44; Sex: Female  | 4,922  | <5  |                        |
| IPCI       | ATE | 90 | Age: <=44; Sex: Female  | 2,073  | <5  |                        |
| IPCI       | ATE | 0  | Age: 45-64; Sex: Male   | 6,480  | <5  |                        |
| IPCI       | ATE | 30 | Age: 45-64; Sex: Male   | 4,502  | <5  |                        |
| IPCI       | ATE | 60 | Age: 45-64; Sex: Male   | 3,015  | 7   | 0.16% (0.34% to 0.07%) |
| IPCI       | ATE | 90 | Age: 45-64; Sex: Male   | 1,165  | 7   | 0.16% (0.34% to 0.07%) |
| IPCI       | ATE | 0  | Age: 45-64; Sex: Female | 7,633  | <5  |                        |
| IPCI       | ATE | 30 | Age: 45-64; Sex: Female | 5,411  | <5  |                        |
| IPCI       | ATE | 60 | Age: 45-64; Sex: Female | 3,648  | <5  |                        |
| IPCI       | ATE | 90 | Age: 45-64; Sex: Female | 1,426  | <5  |                        |
| IPCI       | ATE | 0  | Age: >=65; Sex: Male    | 3,180  | <5  |                        |
| IPCI       | ATE | 30 | Age: >=65; Sex: Male    | 1,850  | <5  |                        |
| IPCI       | ATE | 60 | Age: >=65; Sex: Male    | 1,195  | 6   | 0.27% (0.62% to 0.12%) |
| IPCI       | ATE | 90 | Age: >=65; Sex: Male    | 438    | 7   | 0.35% (0.77% to 0.16%) |
| IPCI       | ATE | 0  | Age: >=65; Sex: Female  | 3,478  | <5  |                        |

|                 |     |    |                         |        |    |                        |
|-----------------|-----|----|-------------------------|--------|----|------------------------|
| IPCI            | ATE | 30 | Age: >=65; Sex: Female  | 2,120  | 7  | 0.23% (0.48% to 0.11%) |
| IPCI            | ATE | 60 | Age: >=65; Sex: Female  | 1,339  | 8  | 0.27% (0.55% to 0.14%) |
| IPCI            | ATE | 90 | Age: >=65; Sex: Female  | 495    | 10 | 0.43% (0.85% to 0.22%) |
| IPCI            | VTE | 0  | Age: <=44; Sex: Male    | 7,995  | <5 |                        |
| IPCI            | VTE | 30 | Age: <=44; Sex: Male    | 5,663  | <5 |                        |
| IPCI            | VTE | 60 | Age: <=44; Sex: Male    | 3,705  | <5 |                        |
| IPCI            | VTE | 90 | Age: <=44; Sex: Male    | 1,600  | <5 |                        |
| IPCI            | VTE | 0  | Age: <=44; Sex: Female  | 10,428 | <5 |                        |
| IPCI            | VTE | 30 | Age: <=44; Sex: Female  | 7,355  | <5 |                        |
| IPCI            | VTE | 60 | Age: <=44; Sex: Female  | 4,915  | 7  | 0.10% (0.21% to 0.05%) |
| IPCI            | VTE | 90 | Age: <=44; Sex: Female  | 2,073  | 7  | 0.10% (0.21% to 0.05%) |
| IPCI            | VTE | 0  | Age: 45-64; Sex: Male   | 6,543  | <5 |                        |
| IPCI            | VTE | 30 | Age: 45-64; Sex: Male   | 4,539  | 17 | 0.30% (0.48% to 0.18%) |
| IPCI            | VTE | 60 | Age: 45-64; Sex: Male   | 3,039  | 19 | 0.34% (0.54% to 0.22%) |
| IPCI            | VTE | 90 | Age: 45-64; Sex: Male   | 1,176  | 19 | 0.34% (0.54% to 0.22%) |
| IPCI            | VTE | 0  | Age: 45-64; Sex: Female | 7,630  | <5 |                        |
| IPCI            | VTE | 30 | Age: 45-64; Sex: Female | 5,418  | <5 |                        |
| IPCI            | VTE | 60 | Age: 45-64; Sex: Female | 3,659  | <5 |                        |
| IPCI            | VTE | 90 | Age: 45-64; Sex: Female | 1,429  | 5  | 0.13% (0.35% to 0.05%) |
| IPCI            | VTE | 0  | Age: >=65; Sex: Male    | 3,292  | <5 |                        |
| IPCI            | VTE | 30 | Age: >=65; Sex: Male    | 1,908  | 12 | 0.45% (0.80% to 0.26%) |
| IPCI            | VTE | 60 | Age: >=65; Sex: Male    | 1,228  | 13 | 0.51% (0.89% to 0.30%) |
| IPCI            | VTE | 90 | Age: >=65; Sex: Male    | 452    | 14 | 0.59% (1.02% to 0.34%) |
| IPCI            | VTE | 0  | Age: >=65; Sex: Female  | 3,505  | <5 |                        |
| IPCI            | VTE | 30 | Age: >=65; Sex: Female  | 2,147  | 8  | 0.27% (0.55% to 0.14%) |
| IPCI            | VTE | 60 | Age: >=65; Sex: Female  | 1,346  | 11 | 0.43% (0.79% to 0.23%) |
| IPCI            | VTE | 90 | Age: >=65; Sex: Female  | 502    | 12 | 0.51% (0.94% to 0.28%) |
| IQVIA LPD Italy | ATE | 0  | Age: <=44; Sex: Male    | 3,497  | <5 |                        |
| IQVIA LPD Italy | ATE | 30 | Age: <=44; Sex: Male    | 2,545  | <5 |                        |
| IQVIA LPD Italy | ATE | 60 | Age: <=44; Sex: Male    | 2,216  | <5 |                        |

|                 |     |    |                         |       |    |                          |
|-----------------|-----|----|-------------------------|-------|----|--------------------------|
| IQVIA LPD Italy | ATE | 90 | Age: <=44; Sex: Male    | 1,912 | <5 |                          |
| IQVIA LPD Italy | ATE | 0  | Age: <=44; Sex: Female  | 4,398 | <5 |                          |
| IQVIA LPD Italy | ATE | 30 | Age: <=44; Sex: Female  | 3,557 | <5 |                          |
| IQVIA LPD Italy | ATE | 60 | Age: <=44; Sex: Female  | 3,202 | <5 |                          |
| IQVIA LPD Italy | ATE | 90 | Age: <=44; Sex: Female  | 2,843 | <5 |                          |
| IQVIA LPD Italy | ATE | 0  | Age: 45-64; Sex: Male   | 4,095 | <5 |                          |
| IQVIA LPD Italy | ATE | 30 | Age: 45-64; Sex: Male   | 3,482 | <5 |                          |
| IQVIA LPD Italy | ATE | 60 | Age: 45-64; Sex: Male   | 3,150 | <5 |                          |
| IQVIA LPD Italy | ATE | 90 | Age: 45-64; Sex: Male   | 2,866 | <5 |                          |
| IQVIA LPD Italy | ATE | 0  | Age: 45-64; Sex: Female | 5,635 | <5 |                          |
| IQVIA LPD Italy | ATE | 30 | Age: 45-64; Sex: Female | 5,079 | <5 |                          |
| IQVIA LPD Italy | ATE | 60 | Age: 45-64; Sex: Female | 4,761 | <5 |                          |
| IQVIA LPD Italy | ATE | 90 | Age: 45-64; Sex: Female | 4,403 | <5 |                          |
| IQVIA LPD Italy | ATE | 0  | Age: >=65; Sex: Male    | 3,176 | <5 |                          |
| IQVIA LPD Italy | ATE | 30 | Age: >=65; Sex: Male    | 2,535 | <5 |                          |
| IQVIA LPD Italy | ATE | 60 | Age: >=65; Sex: Male    | 2,328 |    | 6 0.19% (0.43% to 0.09%) |
| IQVIA LPD Italy | ATE | 90 | Age: >=65; Sex: Male    | 2,164 |    | 6 0.19% (0.43% to 0.09%) |
| IQVIA LPD Italy | ATE | 0  | Age: >=65; Sex: Female  | 3,982 | <5 |                          |
| IQVIA LPD Italy | ATE | 30 | Age: >=65; Sex: Female  | 3,447 | <5 |                          |
| IQVIA LPD Italy | ATE | 60 | Age: >=65; Sex: Female  | 3,229 | <5 |                          |
| IQVIA LPD Italy | ATE | 90 | Age: >=65; Sex: Female  | 3,065 | <5 |                          |
| IQVIA LPD Italy | VTE | 0  | Age: <=44; Sex: Male    | 3,498 | <5 |                          |
| IQVIA LPD Italy | VTE | 30 | Age: <=44; Sex: Male    | 2,546 | <5 |                          |
| IQVIA LPD Italy | VTE | 60 | Age: <=44; Sex: Male    | 2,217 | <5 |                          |
| IQVIA LPD Italy | VTE | 90 | Age: <=44; Sex: Male    | 1,913 | <5 |                          |
| IQVIA LPD Italy | VTE | 0  | Age: <=44; Sex: Female  | 4,393 | <5 |                          |
| IQVIA LPD Italy | VTE | 30 | Age: <=44; Sex: Female  | 3,552 | <5 |                          |
| IQVIA LPD Italy | VTE | 60 | Age: <=44; Sex: Female  | 3,196 | <5 |                          |
| IQVIA LPD Italy | VTE | 90 | Age: <=44; Sex: Female  | 2,837 | <5 |                          |
| IQVIA LPD Italy | VTE | 0  | Age: 45-64; Sex: Male   | 4,114 | <5 |                          |



|                 |     |    |                         |         |     |                        |
|-----------------|-----|----|-------------------------|---------|-----|------------------------|
| IQVIA LPD Italy | VTE | 30 | Age: 45-64; Sex: Male   | 3,507   | <5  |                        |
| IQVIA LPD Italy | VTE | 60 | Age: 45-64; Sex: Male   | 3,172   | 8   | 0.23% (0.45% to 0.11%) |
| IQVIA LPD Italy | VTE | 90 | Age: 45-64; Sex: Male   | 2,885   | 10  | 0.29% (0.54% to 0.16%) |
| IQVIA LPD Italy | VTE | 0  | Age: 45-64; Sex: Female | 5,624   | <5  |                        |
| IQVIA LPD Italy | VTE | 30 | Age: 45-64; Sex: Female | 5,069   | 6   | 0.11% (0.25% to 0.05%) |
| IQVIA LPD Italy | VTE | 60 | Age: 45-64; Sex: Female | 4,747   | 10  | 0.19% (0.36% to 0.10%) |
| IQVIA LPD Italy | VTE | 90 | Age: 45-64; Sex: Female | 4,389   | 10  | 0.19% (0.36% to 0.10%) |
| IQVIA LPD Italy | VTE | 0  | Age: >=65; Sex: Male    | 3,253   | <5  |                        |
| IQVIA LPD Italy | VTE | 30 | Age: >=65; Sex: Male    | 2,587   | 5   | 0.16% (0.38% to 0.07%) |
| IQVIA LPD Italy | VTE | 60 | Age: >=65; Sex: Male    | 2,374   | 10  | 0.32% (0.60% to 0.17%) |
| IQVIA LPD Italy | VTE | 90 | Age: >=65; Sex: Male    | 2,209   | 12  | 0.39% (0.69% to 0.22%) |
| IQVIA LPD Italy | VTE | 0  | Age: >=65; Sex: Female  | 3,956   | <5  |                        |
| IQVIA LPD Italy | VTE | 30 | Age: >=65; Sex: Female  | 3,424   | <5  |                        |
| IQVIA LPD Italy | VTE | 60 | Age: >=65; Sex: Female  | 3,206   | 13  | 0.35% (0.60% to 0.20%) |
| IQVIA LPD Italy | VTE | 90 | Age: >=65; Sex: Female  | 3,037   | 21  | 0.58% (0.89% to 0.38%) |
| SIDIAP CMBD-AH  | ATE | 0  | Age: <=44; Sex: Male    | 105,868 | <5  |                        |
| SIDIAP CMBD-AH  | ATE | 30 | Age: <=44; Sex: Male    | 102,198 | 30  | 0.03% (0.04% to 0.02%) |
| SIDIAP CMBD-AH  | ATE | 60 | Age: <=44; Sex: Male    | 97,041  | 35  | 0.03% (0.05% to 0.02%) |
| SIDIAP CMBD-AH  | ATE | 90 | Age: <=44; Sex: Male    | 87,264  | 36  | 0.03% (0.05% to 0.02%) |
| SIDIAP CMBD-AH  | ATE | 0  | Age: <=44; Sex: Female  | 112,759 | 6   | 0.01% (0.01% to 0.00%) |
| SIDIAP CMBD-AH  | ATE | 30 | Age: <=44; Sex: Female  | 109,446 | 27  | 0.02% (0.04% to 0.02%) |
| SIDIAP CMBD-AH  | ATE | 60 | Age: <=44; Sex: Female  | 104,300 | 29  | 0.03% (0.04% to 0.02%) |
| SIDIAP CMBD-AH  | ATE | 90 | Age: <=44; Sex: Female  | 94,497  | 29  | 0.03% (0.04% to 0.02%) |
| SIDIAP CMBD-AH  | ATE | 0  | Age: 45-64; Sex: Male   | 57,866  | 81  | 0.14% (0.17% to 0.11%) |
| SIDIAP CMBD-AH  | ATE | 30 | Age: 45-64; Sex: Male   | 55,344  | 282 | 0.49% (0.55% to 0.43%) |
| SIDIAP CMBD-AH  | ATE | 60 | Age: 45-64; Sex: Male   | 51,925  | 318 | 0.55% (0.62% to 0.50%) |
| SIDIAP CMBD-AH  | ATE | 90 | Age: 45-64; Sex: Male   | 46,584  | 343 | 0.60% (0.67% to 0.54%) |
| SIDIAP CMBD-AH  | ATE | 0  | Age: 45-64; Sex: Female | 58,685  | 30  | 0.05% (0.07% to 0.04%) |
| SIDIAP CMBD-AH  | ATE | 30 | Age: 45-64; Sex: Female | 56,871  | 137 | 0.23% (0.28% to 0.20%) |
| SIDIAP CMBD-AH  | ATE | 60 | Age: 45-64; Sex: Female | 54,299  | 148 | 0.25% (0.30% to 0.22%) |

|                |     |    |                         |         |      |                        |
|----------------|-----|----|-------------------------|---------|------|------------------------|
| SIDIAP CMBD-AH | ATE | 90 | Age: 45-64; Sex: Female | 49,332  | 153  | 0.26% (0.31% to 0.22%) |
| SIDIAP CMBD-AH | ATE | 0  | Age: >=65; Sex: Male    | 50,920  | 480  | 0.94% (1.03% to 0.86%) |
| SIDIAP CMBD-AH | ATE | 30 | Age: >=65; Sex: Male    | 32,367  | 1395 | 2.74% (2.89% to 2.60%) |
| SIDIAP CMBD-AH | ATE | 60 | Age: >=65; Sex: Male    | 26,378  | 1509 | 2.97% (3.12% to 2.82%) |
| SIDIAP CMBD-AH | ATE | 90 | Age: >=65; Sex: Male    | 22,516  | 1562 | 3.08% (3.23% to 2.93%) |
| SIDIAP CMBD-AH | ATE | 0  | Age: >=65; Sex: Female  | 56,349  | 426  | 0.76% (0.83% to 0.69%) |
| SIDIAP CMBD-AH | ATE | 30 | Age: >=65; Sex: Female  | 39,822  | 1132 | 2.01% (2.13% to 1.90%) |
| SIDIAP CMBD-AH | ATE | 60 | Age: >=65; Sex: Female  | 34,780  | 1255 | 2.23% (2.36% to 2.11%) |
| SIDIAP CMBD-AH | ATE | 90 | Age: >=65; Sex: Female  | 30,458  | 1353 | 2.42% (2.55% to 2.29%) |
| SIDIAP CMBD-AH | VTE | 0  | Age: <=44; Sex: Male    | 105,844 | 14   | 0.01% (0.02% to 0.01%) |
| SIDIAP CMBD-AH | VTE | 30 | Age: <=44; Sex: Male    | 102,154 | 57   | 0.05% (0.07% to 0.04%) |
| SIDIAP CMBD-AH | VTE | 60 | Age: <=44; Sex: Male    | 97,012  | 61   | 0.06% (0.07% to 0.05%) |
| SIDIAP CMBD-AH | VTE | 90 | Age: <=44; Sex: Male    | 87,229  | 64   | 0.06% (0.08% to 0.05%) |
| SIDIAP CMBD-AH | VTE | 0  | Age: <=44; Sex: Female  | 112,747 | <5   |                        |
| SIDIAP CMBD-AH | VTE | 30 | Age: <=44; Sex: Female  | 109,432 | 29   | 0.03% (0.04% to 0.02%) |
| SIDIAP CMBD-AH | VTE | 60 | Age: <=44; Sex: Female  | 104,261 | 57   | 0.05% (0.07% to 0.04%) |
| SIDIAP CMBD-AH | VTE | 90 | Age: <=44; Sex: Female  | 94,457  | 57   | 0.05% (0.07% to 0.04%) |
| SIDIAP CMBD-AH | VTE | 0  | Age: 45-64; Sex: Male   | 58,008  | 130  | 0.22% (0.27% to 0.19%) |
| SIDIAP CMBD-AH | VTE | 30 | Age: 45-64; Sex: Male   | 55,292  | 531  | 0.92% (1.00% to 0.84%) |
| SIDIAP CMBD-AH | VTE | 60 | Age: 45-64; Sex: Male   | 51,958  | 556  | 0.96% (1.05% to 0.89%) |
| SIDIAP CMBD-AH | VTE | 90 | Age: 45-64; Sex: Male   | 46,658  | 580  | 1.01% (1.09% to 0.93%) |
| SIDIAP CMBD-AH | VTE | 0  | Age: 45-64; Sex: Female | 58,697  | 36   | 0.06% (0.09% to 0.04%) |
| SIDIAP CMBD-AH | VTE | 30 | Age: 45-64; Sex: Female | 56,830  | 193  | 0.33% (0.38% to 0.29%) |
| SIDIAP CMBD-AH | VTE | 60 | Age: 45-64; Sex: Female | 54,275  | 211  | 0.36% (0.41% to 0.32%) |
| SIDIAP CMBD-AH | VTE | 90 | Age: 45-64; Sex: Female | 49,315  | 218  | 0.37% (0.43% to 0.33%) |
| SIDIAP CMBD-AH | VTE | 0  | Age: >=65; Sex: Male    | 52,158  | 407  | 0.78% (0.86% to 0.71%) |
| SIDIAP CMBD-AH | VTE | 30 | Age: >=65; Sex: Male    | 32,938  | 1439 | 2.76% (2.90% to 2.62%) |
| SIDIAP CMBD-AH | VTE | 60 | Age: >=65; Sex: Male    | 27,018  | 1551 | 2.98% (3.13% to 2.84%) |
| SIDIAP CMBD-AH | VTE | 90 | Age: >=65; Sex: Male    | 23,110  | 1595 | 3.07% (3.22% to 2.92%) |
| SIDIAP CMBD-AH | VTE | 0  | Age: >=65; Sex: Female  | 57,154  | 248  | 0.43% (0.49% to 0.38%) |

|                |       |    |                         |         |      |                           |
|----------------|-------|----|-------------------------|---------|------|---------------------------|
| SIDIAP CMBD-AH | VTE   | 30 | Age: >=65; Sex: Female  | 40,536  | 810  | 1.42% (1.52% to 1.32%)    |
| SIDIAP CMBD-AH | VTE   | 60 | Age: >=65; Sex: Female  | 35,337  | 951  | 1.67% (1.78% to 1.57%)    |
| SIDIAP CMBD-AH | VTE   | 90 | Age: >=65; Sex: Female  | 30,956  | 1005 | 1.77% (1.88% to 1.66%)    |
| CPRD AURUM     | Death | 0  | Age: <=44; Sex: Male    | 97,060  | <5   |                           |
| CPRD AURUM     | Death | 30 | Age: <=44; Sex: Male    | 73,558  | 31   | 0.03% (0.02% to 0.05%)    |
| CPRD AURUM     | Death | 60 | Age: <=44; Sex: Male    | 37,813  | 36   | 0.04% (0.03% to 0.06%)    |
| CPRD AURUM     | Death | 90 | Age: <=44; Sex: Male    | 25,185  | 39   | 0.05% (0.03% to 0.07%)    |
| CPRD AURUM     | Death | 0  | Age: <=44; Sex: Female  | 124,708 | <5   |                           |
| CPRD AURUM     | Death | 30 | Age: <=44; Sex: Female  | 94,506  | 20   | 0.02% (0.01% to 0.02%)    |
| CPRD AURUM     | Death | 60 | Age: <=44; Sex: Female  | 48,567  | 22   | 0.02% (0.01% to 0.03%)    |
| CPRD AURUM     | Death | 90 | Age: <=44; Sex: Female  | 30,727  | 25   | 0.03% (0.02% to 0.04%)    |
| CPRD AURUM     | Death | 0  | Age: 45-64; Sex: Male   | 67,192  | <5   |                           |
| CPRD AURUM     | Death | 30 | Age: 45-64; Sex: Male   | 49,279  | 303  | 0.49% (0.43% to 0.54%)    |
| CPRD AURUM     | Death | 60 | Age: 45-64; Sex: Male   | 24,792  | 342  | 0.59% (0.53% to 0.66%)    |
| CPRD AURUM     | Death | 90 | Age: 45-64; Sex: Male   | 15,082  | 354  | 0.66% (0.58% to 0.73%)    |
| CPRD AURUM     | Death | 0  | Age: 45-64; Sex: Female | 76,755  | <5   |                           |
| CPRD AURUM     | Death | 30 | Age: 45-64; Sex: Female | 56,423  | 173  | 0.24% (0.20% to 0.28%)    |
| CPRD AURUM     | Death | 60 | Age: 45-64; Sex: Female | 28,554  | 196  | 0.30% (0.25% to 0.34%)    |
| CPRD AURUM     | Death | 90 | Age: 45-64; Sex: Female | 17,108  | 205  | 0.33% (0.28% to 0.38%)    |
| CPRD AURUM     | Death | 0  | Age: >=65; Sex: Male    | 22,417  | <5   |                           |
| CPRD AURUM     | Death | 30 | Age: >=65; Sex: Male    | 14,706  | 1839 | 8.65% (8.26% to 9.02%)    |
| CPRD AURUM     | Death | 60 | Age: >=65; Sex: Male    | 7,767   | 1999 | 10.00% (9.57% to 10.43%)  |
| CPRD AURUM     | Death | 90 | Age: >=65; Sex: Male    | 4,674   | 2042 | 10.59% (10.12% to 11.05%) |
| CPRD AURUM     | Death | 0  | Age: >=65; Sex: Female  | 26,934  | <5   |                           |
| CPRD AURUM     | Death | 30 | Age: >=65; Sex: Female  | 17,434  | 1897 | 7.44% (7.12% to 7.77%)    |
| CPRD AURUM     | Death | 60 | Age: >=65; Sex: Female  | 8,770   | 2078 | 8.78% (8.40% to 9.15%)    |
| CPRD AURUM     | Death | 90 | Age: >=65; Sex: Female  | 5,040   | 2127 | 9.38% (8.97% to 9.79%)    |
| IPCI           | Death | 0  | Age: <=44; Sex: Male    | 7,995   | <5   |                           |
| IPCI           | Death | 30 | Age: <=44; Sex: Male    | 5,665   | <5   |                           |
| IPCI           | Death | 60 | Age: <=44; Sex: Male    | 3,706   | <5   |                           |

|                 |       |    |                         |        |     |                        |
|-----------------|-------|----|-------------------------|--------|-----|------------------------|
| IPCI            | Death | 90 | Age: <=44; Sex: Male    | 1,601  | <5  |                        |
| IPCI            | Death | 0  | Age: <=44; Sex: Female  | 10,446 | <5  |                        |
| IPCI            | Death | 30 | Age: <=44; Sex: Female  | 7,373  | <5  |                        |
| IPCI            | Death | 60 | Age: <=44; Sex: Female  | 4,928  | <5  |                        |
| IPCI            | Death | 90 | Age: <=44; Sex: Female  | 2,075  | <5  |                        |
| IPCI            | Death | 0  | Age: 45-64; Sex: Male   | 6,551  | <5  |                        |
| IPCI            | Death | 30 | Age: 45-64; Sex: Male   | 4,566  | 8   | 0.13% (0.04% to 0.22%) |
| IPCI            | Death | 60 | Age: 45-64; Sex: Male   | 3,063  | 11  | 0.21% (0.08% to 0.33%) |
| IPCI            | Death | 90 | Age: 45-64; Sex: Male   | 1,185  | 13  | 0.29% (0.12% to 0.46%) |
| IPCI            | Death | 0  | Age: 45-64; Sex: Female | 7,654  | <5  |                        |
| IPCI            | Death | 30 | Age: 45-64; Sex: Female | 5,441  | 9   | 0.13% (0.04% to 0.21%) |
| IPCI            | Death | 60 | Age: 45-64; Sex: Female | 3,674  | 11  | 0.17% (0.07% to 0.27%) |
| IPCI            | Death | 90 | Age: 45-64; Sex: Female | 1,438  | 12  | 0.20% (0.08% to 0.31%) |
| IPCI            | Death | 0  | Age: >=65; Sex: Male    | 2,960  | <5  |                        |
| IPCI            | Death | 30 | Age: >=65; Sex: Male    | 1,893  | 169 | 6.56% (5.59% to 7.51%) |
| IPCI            | Death | 60 | Age: >=65; Sex: Male    | 1,233  | 182 | 7.34% (6.29% to 8.38%) |
| IPCI            | Death | 90 | Age: >=65; Sex: Male    | 455    | 184 | 7.50% (6.43% to 8.56%) |
| IPCI            | Death | 0  | Age: >=65; Sex: Female  | 3,291  | <5  |                        |
| IPCI            | Death | 30 | Age: >=65; Sex: Female  | 2,136  | 113 | 3.90% (3.19% to 4.61%) |
| IPCI            | Death | 60 | Age: >=65; Sex: Female  | 1,358  | 127 | 4.66% (3.84% to 5.46%) |
| IPCI            | Death | 90 | Age: >=65; Sex: Female  | 511    | 133 | 5.23% (4.30% to 6.16%) |
| IQVIA LPD Italy | Death | 0  | Age: <=44; Sex: Male    | 3,494  | <5  |                        |
| IQVIA LPD Italy | Death | 30 | Age: <=44; Sex: Male    | 2,542  | <5  |                        |
| IQVIA LPD Italy | Death | 60 | Age: <=44; Sex: Male    | 2,213  | <5  |                        |
| IQVIA LPD Italy | Death | 90 | Age: <=44; Sex: Male    | 1,913  | <5  |                        |
| IQVIA LPD Italy | Death | 0  | Age: <=44; Sex: Female  | 4,395  | <5  |                        |
| IQVIA LPD Italy | Death | 30 | Age: <=44; Sex: Female  | 3,556  | <5  |                        |
| IQVIA LPD Italy | Death | 60 | Age: <=44; Sex: Female  | 3,201  | <5  |                        |
| IQVIA LPD Italy | Death | 90 | Age: <=44; Sex: Female  | 2,842  | <5  |                        |
| IQVIA LPD Italy | Death | 0  | Age: 45-64; Sex: Male   | 4,074  | <5  |                        |

|                 |       |    |                         |         |     |                        |
|-----------------|-------|----|-------------------------|---------|-----|------------------------|
| IQVIA LPD Italy | Death | 30 | Age: 45-64; Sex: Male   | 3,508   | 17  | 0.45% (0.23% to 0.66%) |
| IQVIA LPD Italy | Death | 60 | Age: 45-64; Sex: Male   | 3,194   | 21  | 0.56% (0.32% to 0.80%) |
| IQVIA LPD Italy | Death | 90 | Age: 45-64; Sex: Male   | 2,913   | 23  | 0.63% (0.37% to 0.89%) |
| IQVIA LPD Italy | Death | 0  | Age: 45-64; Sex: Female | 5,625   | <5  |                        |
| IQVIA LPD Italy | Death | 30 | Age: 45-64; Sex: Female | 5,083   | 6   | 0.11% (0.02% to 0.20%) |
| IQVIA LPD Italy | Death | 60 | Age: 45-64; Sex: Female | 4,765   | 6   | 0.11% (0.02% to 0.20%) |
| IQVIA LPD Italy | Death | 90 | Age: 45-64; Sex: Female | 4,407   | 6   | 0.11% (0.02% to 0.20%) |
| IQVIA LPD Italy | Death | 0  | Age: >=65; Sex: Male    | 2,788   | <5  |                        |
| IQVIA LPD Italy | Death | 30 | Age: >=65; Sex: Male    | 2,510   | 167 | 6.10% (5.20% to 6.99%) |
| IQVIA LPD Italy | Death | 60 | Age: >=65; Sex: Male    | 2,370   | 193 | 7.09% (6.12% to 8.05%) |
| IQVIA LPD Italy | Death | 90 | Age: >=65; Sex: Male    | 2,221   | 202 | 7.45% (6.45% to 8.43%) |
| IQVIA LPD Italy | Death | 0  | Age: >=65; Sex: Female  | 3,616   | <5  |                        |
| IQVIA LPD Italy | Death | 30 | Age: >=65; Sex: Female  | 3,374   | 113 | 3.18% (2.60% to 3.75%) |
| IQVIA LPD Italy | Death | 60 | Age: >=65; Sex: Female  | 3,204   | 128 | 3.62% (3.00% to 4.23%) |
| IQVIA LPD Italy | Death | 90 | Age: >=65; Sex: Female  | 3,050   | 132 | 3.74% (3.11% to 4.37%) |
| SIDIAP CMBD-AH  | Death | 0  | Age: <=44; Sex: Male    | 105,639 | <5  |                        |
| SIDIAP CMBD-AH  | Death | 30 | Age: <=44; Sex: Male    | 102,091 | 14  | 0.01% (0.01% to 0.02%) |
| SIDIAP CMBD-AH  | Death | 60 | Age: <=44; Sex: Male    | 96,991  | 22  | 0.02% (0.01% to 0.03%) |
| SIDIAP CMBD-AH  | Death | 90 | Age: <=44; Sex: Male    | 87,206  | 23  | 0.02% (0.01% to 0.03%) |
| SIDIAP CMBD-AH  | Death | 0  | Age: <=44; Sex: Female  | 112,641 | <5  |                        |
| SIDIAP CMBD-AH  | Death | 30 | Age: <=44; Sex: Female  | 109,399 | 10  | 0.01% (0.00% to 0.01%) |
| SIDIAP CMBD-AH  | Death | 60 | Age: <=44; Sex: Female  | 104,279 | 12  | 0.01% (0.00% to 0.02%) |
| SIDIAP CMBD-AH  | Death | 90 | Age: <=44; Sex: Female  | 94,489  | 15  | 0.01% (0.01% to 0.02%) |
| SIDIAP CMBD-AH  | Death | 0  | Age: 45-64; Sex: Male   | 55,286  | <5  |                        |
| SIDIAP CMBD-AH  | Death | 30 | Age: 45-64; Sex: Male   | 53,996  | 184 | 0.34% (0.29% to 0.38%) |
| SIDIAP CMBD-AH  | Death | 60 | Age: 45-64; Sex: Male   | 51,492  | 312 | 0.58% (0.51% to 0.64%) |
| SIDIAP CMBD-AH  | Death | 90 | Age: 45-64; Sex: Male   | 46,490  | 371 | 0.70% (0.62% to 0.77%) |
| SIDIAP CMBD-AH  | Death | 0  | Age: 45-64; Sex: Female | 57,496  | <5  |                        |
| SIDIAP CMBD-AH  | Death | 30 | Age: 45-64; Sex: Female | 56,346  | 91  | 0.16% (0.13% to 0.19%) |
| SIDIAP CMBD-AH  | Death | 60 | Age: 45-64; Sex: Female | 54,052  | 134 | 0.24% (0.20% to 0.28%) |

|                |       |    |                         |        |      |                           |
|----------------|-------|----|-------------------------|--------|------|---------------------------|
| SIDIAP CMBD-AH | Death | 90 | Age: 45-64; Sex: Female | 49,193 | 150  | 0.27% (0.22% to 0.31%)    |
| SIDIAP CMBD-AH | Death | 0  | Age: >=65; Sex: Male    | 26,999 | <5   |                           |
| SIDIAP CMBD-AH | Death | 30 | Age: >=65; Sex: Male    | 24,187 | 2628 | 9.77% (9.41% to 10.12%)   |
| SIDIAP CMBD-AH | Death | 60 | Age: >=65; Sex: Male    | 22,713 | 3371 | 12.57% (12.17% to 12.97%) |
| SIDIAP CMBD-AH | Death | 90 | Age: >=65; Sex: Male    | 20,472 | 3664 | 13.74% (13.33% to 14.15%) |
| SIDIAP CMBD-AH | Death | 0  | Age: >=65; Sex: Female  | 34,936 | <5   |                           |
| SIDIAP CMBD-AH | Death | 30 | Age: >=65; Sex: Female  | 32,267 | 2428 | 6.98% (6.71% to 7.24%)    |
| SIDIAP CMBD-AH | Death | 60 | Age: >=65; Sex: Female  | 30,782 | 3058 | 8.81% (8.51% to 9.11%)    |
| SIDIAP CMBD-AH | Death | 90 | Age: >=65; Sex: Female  | 28,185 | 3386 | 9.82% (9.50% to 10.13%)   |

Supplementary Table 2. Hazard ratios associated with VTE/ ATE and COVID-19 worsening\*, adjusted for age and sex

| <b>Transition</b>                  | <b>Hazard ratio (95% confidence interval)</b> |
|------------------------------------|-----------------------------------------------|
| <b><i>VTE multistate model</i></b> |                                               |
| COVID-19 to COVID-19 hospitalised  | 1.36 (0.95 to 1.96)                           |
| COVID-19 to death                  | 4.42 (3.07 to 6.36)                           |
| COVID-19 hospitalised to death     | 1.63 (1.39 to 1.90)                           |
| <b><i>ATE multistate model</i></b> |                                               |
| COVID-19 to COVID-19 hospitalised  | 1.05 (0.89 to 1.25)                           |
| COVID-19 to death                  | 3.16 (2.65 to 3.75)                           |
| COVID-19 hospitalised to death     | 1.93 (1.57 to 2.37)                           |

\*Data from SIDIAP CMBD-AH: Information System for Research in Primary Care with hospital linkage.

Supplementary Table 3. VTE multistate model transitions

|                                 |                     | From General Population                |                               |                     | From COVID-19 diagnosed or test positive |                               |                     | VTE (pre-hospitalisation)     |                     | From hospitalised with COVID-19 |                     | From VTE (post-hospitalisation) |
|---------------------------------|---------------------|----------------------------------------|-------------------------------|---------------------|------------------------------------------|-------------------------------|---------------------|-------------------------------|---------------------|---------------------------------|---------------------|---------------------------------|
|                                 | Overall             | To COVID-19 diagnosed or test positive | To hospitalised with COVID-19 | To death            | To VTE (pre-hospitalisation)             | To hospitalised with COVID-19 | To death            | To hospitalised with COVID-19 | To death            | To VTE (post-hospitalisation)   | To death            | To death                        |
| N                               | 5,489,533           | 376,349                                | 9,091                         | 35,314              | 370                                      | 21,014                        | 3,502               | 29                            | 20                  | 783                             | 4,365               | 164                             |
| Age                             | 44 [25 to 60]       | 40 [22 to 55]                          | 72 [57 to 83]                 | 84 [72 to 90]       | 66 [55 to 79]                            | 64 [51 to 76]                 | 86 [79 to 91]       | 69 [58 to 77]                 | 83 [72 to 87]       | 68 [58 to 77]                   | 82 [74 to 88]       | 75 [68 to 83]                   |
| Age: Under 20                   | 1,068,646 (19.5%)   | 81,883 (21.8%)                         | 126 (1.4%)                    | 95 (0.3%)           | 0 (0.0%)                                 | 202 (1.0%)                    | <5                  | 0 (0.0%)                      | 0 (0.0%)            | 0 (0.0%)                        | <5                  | 0 (0.0%)                        |
| Age: 20 to 29                   | 570,979 (10.4%)     | 49,721 (13.2%)                         | 249 (2.7%)                    | 129 (0.4%)          | 9 (2.4%)                                 | 569 (2.7%)                    | <5                  | 0 (0.0%)                      | 0 (0.0%)            | 6 (0.8%)                        | <5                  | 0 (0.0%)                        |
| Age: 30 to 39                   | 723,084 (13.2%)     | 52,474 (13.9%)                         | 393 (4.3%)                    | 302 (0.9%)          | 16 (4.3%)                                | 1,271 (6.0%)                  | 13 (0.4%)           | <5                            | 0 (0.0%)            | 22 (2.8%)                       | 12 (0.3%)           | <5                              |
| Age: 40 to 49                   | 951,192 (17.3%)     | 68,186 (18.1%)                         | 721 (7.9%)                    | 954 (2.7%)          | 43 (11.6%)                               | 2,662 (12.7%)                 | 32 (0.9%)           | <5                            | 0 (0.0%)            | 56 (7.2%)                       | 55 (1.3%)           | <5                              |
| Age: 50 to 59                   | 788,718 (14.4%)     | 53,400 (14.2%)                         | 1,105 (12.2%)                 | 2,377 (6.7%)        | 62 (16.8%)                               | 3,994 (19.0%)                 | 93 (2.7%)           | <5                            | <5                  | 143 (18.3%)                     | 151 (3.5%)          | 16 (9.8%)                       |
| Age: 60 to 69                   | 606,110 (11.0%)     | 31,827 (8.5%)                          | 1,485 (16.3%)                 | 3,953 (11.2%)       | 76 (20.5%)                               | 4,261 (20.3%)                 | 232 (6.6%)          | 7 (24.1%)                     | <5                  | 193 (24.6%)                     | 472 (10.8%)         | 32 (19.5%)                      |
| Age: 70 to 79                   | 456,117 (8.3%)      | 20,095 (5.3%)                          | 2,023 (22.3%)                 | 6,302 (17.8%)       | 75 (20.3%)                               | 4,007 (19.1%)                 | 505 (14.4%)         | 9 (31.0%)                     | <5                  | 213 (27.2%)                     | 1,051 (24.1%)       | 54 (32.9%)                      |
| Age: 80 or older                | 324,687 (5.9%)      | 18,763 (5.0%)                          | 2,989 (32.9%)                 | 21,202 (60.0%)      | 89 (24.1%)                               | 4,048 (19.3%)                 | 2,623 (74.9%)       | 5 (17.2%)                     | 12 (60.0%)          | 150 (19.2%)                     | 2,619 (60.0%)       | 58 (35.4%)                      |
| Sex: Male                       | 2,715,176 (49.5%)   | 180,221 (47.9%)                        | 4,987 (54.9%)                 | 18,204 (51.5%)      | 177 (47.8%)                              | 11,632 (55.4%)                | 1,618 (46.2%)       | 16 (55.2%)                    | 10 (50.0%)          | 474 (60.5%)                     | 2,456 (56.3%)       | 103 (62.8%)                     |
| Years of prior observation time | 14.7 [12.9 to 14.7] | 14.7 [13.0 to 14.7]                    | 14.7 [14.7 to 14.7]           | 14.7 [14.7 to 14.7] | 14.7 [14.7 to 14.7]                      | 14.7 [14.7 to 14.7]           | 14.7 [14.7 to 14.7] | 14.7 [14.7 to 14.7]           | 14.7 [14.7 to 14.7] | 14.7 [14.7 to 14.7]             | 14.7 [14.7 to 14.7] | 14.7 [14.7 to 14.7]             |
| Comorbidities                   |                     |                                        |                               |                     |                                          |                               |                     |                               |                     |                                 |                     |                                 |
| Autoimmune disease              | 83,377 (1.5%)       | 5,473 (1.5%)                           | 324 (3.6%)                    | 1,369 (3.9%)        | 12 (3.2%)                                | 652 (3.1%)                    | 160 (4.6%)          | <5                            | 0 (0.0%)            | 28 (3.6%)                       | 212 (4.9%)          | 6 (3.7%)                        |
| Antiphospholipid syndrome       | 2,351 (0.0%)        | 145 (0.0%)                             | 5 (0.1%)                      | 23 (0.1%)           | 0 (0.0%)                                 | 14 (0.1%)                     | <5                  | 0 (0.0%)                      | 0 (0.0%)            | 0 (0.0%)                        | 5 (0.1%)            | 0 (0.0%)                        |
| Thrombophilia                   | 4,871 (0.1%)        | 332 (0.1%)                             | 17 (0.2%)                     | 59 (0.2%)           | <5                                       | 31 (0.1%)                     | <5                  | 0 (0.0%)                      | 0 (0.0%)            | 0 (0.0%)                        | 10 (0.2%)           | 0 (0.0%)                        |



|                                                    |                      |                |               |                   |             |               |                  |            |               |             |                  |            |
|----------------------------------------------------|----------------------|----------------|---------------|-------------------|-------------|---------------|------------------|------------|---------------|-------------|------------------|------------|
| Asthma                                             | 293,530<br>(5.3%)    | 22,752 (6.0%)  | 619 (6.8%)    | 1,998<br>(5.7%)   | 34 (9.2%)   | 1,452 (6.9%)  | 214<br>(6.1%)    | 6 (20.7%)  | 0 (0.0%)      | 56 (7.2%)   | 290<br>(6.6%)    | 9 (5.5%)   |
| Atrial fibrillation                                | 131,106<br>(2.4%)    | 7,980 (2.1%)   | 1,408 (15.5%) | 8,413<br>(23.8%)  | 19 (5.1%)   | 1,790 (8.5%)  | 829<br>(23.7%)   | 0 (0.0%)   | <5            | 36 (4.6%)   | 1,107<br>(25.4%) | 13 (7.9%)  |
| Malignant neoplastic disease                       | 334,738<br>(6.1%)    | 18,744 (5.0%)  | 2,029 (22.3%) | 13,700<br>(38.8%) | 64 (17.3%)  | 3,109 (14.8%) | 1,059<br>(30.2%) | 6 (20.7%)  | 10<br>(50.0%) | 135 (17.2%) | 1,460<br>(33.4%) | 35 (21.3%) |
| Diabetes mellitus                                  | 405,227<br>(7.4%)    | 26,227 (7.0%)  | 2,739 (30.1%) | 10,497<br>(29.7%) | 65 (17.6%)  | 4,687 (22.3%) | 1,074<br>(30.7%) | <5         | 7<br>(35.0%)  | 163 (20.8%) | 1,580<br>(36.2%) | 43 (26.2%) |
| Obesity                                            | 849,916<br>(15.5%)   | 62,904 (16.7%) | 3,237 (35.6%) | 9,073<br>(25.7%)  | 139 (37.6%) | 7,167 (34.1%) | 924<br>(26.4%)   | 10 (34.5%) | 7<br>(35.0%)  | 258 (33.0%) | 1,561<br>(35.8%) | 56 (34.1%) |
| Heart disease                                      | 573,769<br>(10.5%)   | 35,051 (9.3%)  | 3,780 (41.6%) | 19,130<br>(54.2%) | 85 (23.0%)  | 6,064 (28.9%) | 1,985<br>(56.7%) | 10 (34.5%) | 7<br>(35.0%)  | 224 (28.6%) | 2,635<br>(60.4%) | 59 (36.0%) |
| Hypertensive disorder                              | 925,838<br>(16.9%)   | 55,515 (14.8%) | 4,940 (54.3%) | 21,319<br>(60.4%) | 162 (43.8%) | 8,976 (42.7%) | 2,243<br>(64.0%) | 14 (48.3%) | 11<br>(55.0%) | 349 (44.6%) | 2,964<br>(67.9%) | 91 (55.5%) |
| Renal impairment                                   | 239,550<br>(4.4%)    | 14,295 (3.8%)  | 2,512 (27.6%) | 13,374<br>(37.9%) | 56 (15.1%)  | 3,410 (16.2%) | 1,456<br>(41.6%) | 6 (20.7%)  | 5<br>(25.0%)  | 124 (15.8%) | 1,959<br>(44.9%) | 37 (22.6%) |
| COPD                                               | 154,015<br>(2.8%)    | 8,323 (2.2%)   | 1,402 (15.4%) | 6,768<br>(19.2%)  | 32 (8.6%)   | 1,938 (9.2%)  | 595<br>(17.0%)   | 5 (17.2%)  | <5            | 77 (9.8%)   | 956<br>(21.9%)   | 22 (13.4%) |
| Dementia                                           | 54,963<br>(1.0%)     | 5,828 (1.5%)   | 583 (6.4%)    | 6,837<br>(19.4%)  | 19 (5.1%)   | 977 (4.6%)    | 1,126<br>(32.2%) | 0 (0.0%)   | 5<br>(25.0%)  | 32 (4.1%)   | 695<br>(15.9%)   | 16 (9.8%)  |
| Smoking                                            | 1,116,778<br>(20.3%) | 64,926 (17.3%) | 1,985 (21.8%) | 8,610<br>(24.4%)  | 60 (16.2%)  | 4,349 (20.7%) | 630<br>(18.0%)   | 5 (17.2%)  | <5            | 173 (22.1%) | 1,027<br>(23.5%) | 48 (29.3%) |
| Medication use (183 days prior to four days prior) |                      |                |               |                   |             |               |                  |            |               |             |                  |            |
| Non-steroidal anti-inflammatory drugs              | 940,465<br>(17.1%)   | 74,149 (19.7%) | 2,269 (25.0%) | 8,308<br>(23.5%)  | 96 (25.9%)  | 5,160 (24.6%) | 895<br>(25.6%)   | 6 (20.7%)  | 7<br>(35.0%)  | 192 (24.5%) | 1,086<br>(24.9%) | 37 (22.6%) |
| Cox2 inhibitors                                    | 22,207<br>(0.4%)     | 1,593 (0.4%)   | 49 (0.5%)     | 112<br>(0.3%)     | <5          | 156 (0.7%)    | 19<br>(0.5%)     | 0 (0.0%)   | 0 (0.0%)      | 9 (1.1%)    | 22<br>(0.5%)     | <5         |
| Systemic corticosteroids                           | 207,880<br>(3.8%)    | 15,410 (4.1%)  | 796 (8.8%)    | 4,302<br>(12.2%)  | 20 (5.4%)   | 1,445 (6.9%)  | 406<br>(11.6%)   | <5         | <5            | 51 (6.5%)   | 500<br>(11.5%)   | 17 (10.4%) |
| Antithrombotic and anticoagulant therapies         | 65,631<br>(1.2%)     | 4,633 (1.2%)   | 412 (4.5%)    | 2,481<br>(7.0%)   | 15 (4.1%)   | 613 (2.9%)    | 221<br>(6.3%)    | 0 (0.0%)   | <5            | 32 (4.1%)   | 262<br>(6.0%)    | 9 (5.5%)   |
| Lipid modifying agents                             | 46,713<br>(0.9%)     | 2,879 (0.8%)   | 197 (2.2%)    | 1,119<br>(3.2%)   | 6 (1.6%)    | 386 (1.8%)    | 92<br>(2.6%)     | <5         | 0 (0.0%)      | 11 (1.4%)   | 114<br>(2.6%)    | 0 (0.0%)   |
| Antineoplastic and immunomodulating agents         | 45,875<br>(0.8%)     | 3,992 (1.1%)   | 134 (1.5%)    | 911<br>(2.6%)     | <5          | 252 (1.2%)    | 78<br>(2.2%)     | 0 (0.0%)   | 0 (0.0%)      | 8 (1.0%)    | 68<br>(1.6%)     | <5         |
| Hormonal contraceptives for systemic use           | 44,664<br>(0.8%)     | 4,701 (1.2%)   | 73 (0.8%)     | 353<br>(1.0%)     | <5          | 138 (0.7%)    | 23<br>(0.7%)     | 0 (0.0%)   | 0 (0.0%)      | <5          | 22<br>(0.5%)     | 0 (0.0%)   |
| Tamoxifen                                          | 1,304<br>(0.0%)      | 75 (0.0%)      | <5            | 27<br>(0.1%)      | <5          | 9 (0.0%)      | <5               | 0 (0.0%)   | 0 (0.0%)      | 0 (0.0%)    | <5               | 0 (0.0%)   |

|                                                   |                      |                 |               |                   |             |                   |                  |            |               |             |                  |             |
|---------------------------------------------------|----------------------|-----------------|---------------|-------------------|-------------|-------------------|------------------|------------|---------------|-------------|------------------|-------------|
| Sex hormones and modulators of the genital system | 54,885<br>(1.0%)     | 5,520 (1.5%)    | 99 (1.1%)     | 385<br>(1.1%)     | <5          | 198 (0.9%)        | 27<br>(0.8%)     | 0 (0.0%)   | 0 (0.0%)      | <5          | 28<br>(0.6%)     | 0 (0.0%)    |
| Immunoglobulins                                   | 2,820<br>(0.1%)      | 218 (0.1%)      | 11 (0.1%)     | 0 (0.0%)          | 0 (0.0%)    | 14 (0.1%)         | 0 (0.0%)         | 0 (0.0%)   | 0 (0.0%)      | 0 (0.0%)    | 0 (0.0%)         | 0 (0.0%)    |
| Summary variables                                 |                      |                 |               |                   |             |                   |                  |            |               |             |                  |             |
| One or more condition of interest                 | 1,455,634<br>(26.5%) | 98,897 (26.3%)  | 6,305 (69.4%) | 27,943<br>(79.1%) | 222 (60.0%) | 12,363<br>(58.8%) | 2,766<br>(79.0%) | 15 (51.7%) | 17<br>(85.0%) | 478 (61.0%) | 3,670<br>(84.1%) | 118 (72.0%) |
| One or more medication of interest                | 1,071,907<br>(19.5%) | 84,541 (22.5%)  | 2,678 (29.5%) | 10,141<br>(28.7%) | 105 (28.4%) | 5,911 (28.1%)     | 1,082<br>(30.9%) | 6 (20.7%)  | 8<br>(40.0%)  | 216 (27.6%) | 1,339<br>(30.7%) | 46 (28.0%)  |
| One or more condition/medication of interest      | 2,161,241<br>(39.4%) | 155,399 (41.3%) | 6,985 (76.8%) | 29,214<br>(82.7%) | 254 (68.6%) | 14,545<br>(69.2%) | 2,936<br>(83.8%) | 17 (58.6%) | 19<br>(95.0%) | 550 (70.2%) | 3,863<br>(88.5%) | 125 (76.2%) |

Supplementary Table 4. ATE multistate model transitions

|                                 | Overall             | From General Population                |                               |                     | From COVID-19 diagnosed or test positive |                               |                     | ATE (pre-hospitalisation)     |                     | From hospitalised with COVID-19 |                     | From ATE (post-hospitalisation) |
|---------------------------------|---------------------|----------------------------------------|-------------------------------|---------------------|------------------------------------------|-------------------------------|---------------------|-------------------------------|---------------------|---------------------------------|---------------------|---------------------------------|
|                                 |                     | To COVID-19 diagnosed or test positive | To hospitalised with COVID-19 | To death            | To ATE (pre-hospitalisation)             | To hospitalised with COVID-19 | To death            | To hospitalised with COVID-19 | To death            | To ATE (post-hospitalisation)   | To death            | To death                        |
| N                               | 5,489,533           | 376,349                                | 9,091                         | 35,314              | 1,181                                    | 20,910                        | 3,440               | 133                           | 82                  | 323                             | 4,437               | 92                              |
| Age                             | 44 [25 to 60]       | 40 [22 to 55]                          | 72 [57 to 83]                 | 84 [72 to 90]       | 73 [61 to 82]                            | 64 [51 to 76]                 | 87 [80 to 91]       | 75 [66 to 83]                 | 84 [75 to 89]       | 75 [65 to 84]                   | 82 [74 to 88]       | 79 [72 to 85]                   |
| Age: Under 20                   | 1,068,646 (19.5%)   | 81,883 (21.8%)                         | 126 (1.4%)                    | 95 (0.3%)           | 5 (0.4%)                                 | 202 (1.0%)                    | <5                  | 0 (0.0%)                      | 0 (0.0%)            | 0 (0.0%)                        | <5                  | 0 (0.0%)                        |
| Age: 20 to 29                   | 570,979 (10.4%)     | 49,721 (13.2%)                         | 249 (2.7%)                    | 129 (0.4%)          | 8 (0.7%)                                 | 569 (2.7%)                    | <5                  | 0 (0.0%)                      | 0 (0.0%)            | <5                              | <5                  | 0 (0.0%)                        |
| Age: 30 to 39                   | 723,084 (13.2%)     | 52,474 (13.9%)                         | 393 (4.3%)                    | 302 (0.9%)          | 19 (1.6%)                                | 1,271 (6.1%)                  | 12 (0.3%)           | <5                            | <5                  | <5                              | 13 (0.3%)           | 0 (0.0%)                        |
| Age: 40 to 49                   | 951,192 (17.3%)     | 68,186 (18.1%)                         | 721 (7.9%)                    | 954 (2.7%)          | 79 (6.7%)                                | 2,660 (12.7%)                 | 31 (0.9%)           | 5 (3.8%)                      | <5                  | 12 (3.7%)                       | 57 (1.3%)           | <5                              |
| Age: 50 to 59                   | 788,718 (14.4%)     | 53,400 (14.2%)                         | 1,105 (12.2%)                 | 2,377 (6.7%)        | 141 (11.9%)                              | 3,986 (19.1%)                 | 96 (2.8%)           | 12 (9.0%)                     | 0 (0.0%)            | 36 (11.1%)                      | 160 (3.6%)          | 7 (7.6%)                        |
| Age: 60 to 69                   | 606,110 (11.0%)     | 31,827 (8.5%)                          | 1,485 (16.3%)                 | 3,953 (11.2%)       | 246 (20.8%)                              | 4,241 (20.3%)                 | 224 (6.5%)          | 27 (20.3%)                    | 9 (11.0%)           | 55 (17.0%)                      | 492 (11.1%)         | 12 (13.0%)                      |
| Age: 70 to 79                   | 456,117 (8.3%)      | 20,095 (5.3%)                          | 2,023 (22.3%)                 | 6,302 (17.8%)       | 313 (26.5%)                              | 3,974 (19.0%)                 | 492 (14.3%)         | 42 (31.6%)                    | 17 (20.7%)          | 98 (30.3%)                      | 1,078 (24.3%)       | 27 (29.3%)                      |
| Age: 80 or older                | 324,687 (5.9%)      | 18,763 (5.0%)                          | 2,989 (32.9%)                 | 21,202 (60.0%)      | 370 (31.3%)                              | 4,007 (19.2%)                 | 2,581 (75.0%)       | 46 (34.6%)                    | 54 (65.9%)          | 117 (36.2%)                     | 2,632 (59.3%)       | 45 (48.9%)                      |
| Sex: Male                       | 2,715,176 (49.5%)   | 180,221 (47.9%)                        | 4,987 (54.9%)                 | 18,204 (51.5%)      | 610 (51.7%)                              | 11,570 (55.3%)                | 1,592 (46.3%)       | 78 (58.6%)                    | 36 (43.9%)          | 196 (60.7%)                     | 2,502 (56.4%)       | 57 (62.0%)                      |
| Years of prior observation time | 14.7 [12.9 to 14.7] | 14.7 [13.0 to 14.7]                    | 14.7 [14.7 to 14.7]           | 14.7 [14.7 to 14.7] | 14.7 [14.7 to 14.7]                      | 14.7 [14.7 to 14.7]           | 14.7 [14.7 to 14.7] | 14.7 [14.7 to 14.7]           | 14.7 [14.7 to 14.7] | 14.7 [14.7 to 14.7]             | 14.7 [14.7 to 14.7] | 14.7 [14.7 to 14.7]             |
| Comorbidities                   |                     |                                        |                               |                     |                                          |                               |                     |                               |                     |                                 |                     |                                 |
| Autoimmune disease              | 83,377 (1.5%)       | 5,473 (1.5%)                           | 324 (3.6%)                    | 1,369 (3.9%)        | 41 (3.5%)                                | 648 (3.1%)                    | 157 (4.6%)          | 5 (3.8%)                      | <5                  | 15 (4.6%)                       | 212 (4.8%)          | 6 (6.5%)                        |
| Antiphospholipid syndrome       | 2,351 (0.0%)        | 145 (0.0%)                             | 5 (0.1%)                      | 23 (0.1%)           | <5                                       | 14 (0.1%)                     | <5                  | 0 (0.0%)                      | 0 (0.0%)            | 0 (0.0%)                        | 5 (0.1%)            | 0 (0.0%)                        |
| Thrombophilia                   | 4,871 (0.1%)        | 332 (0.1%)                             | 17 (0.2%)                     | 59 (0.2%)           | 8 (0.7%)                                 | 28 (0.1%)                     | <5                  | <5                            | 0 (0.0%)            | <5                              | 9 (0.2%)            | <5                              |

|                                                    |                      |                |               |                   |             |               |                  |            |               |             |                  |            |
|----------------------------------------------------|----------------------|----------------|---------------|-------------------|-------------|---------------|------------------|------------|---------------|-------------|------------------|------------|
| Asthma                                             | 293,530<br>(5.3%)    | 22,752 (6.0%)  | 619 (6.8%)    | 1,998<br>(5.7%)   | 65 (5.5%)   | 1,448 (6.9%)  | 212<br>(6.2%)    | 10 (7.5%)  | <5            | 17 (5.3%)   | 294<br>(6.6%)    | 5 (5.4%)   |
| Atrial fibrillation                                | 131,106<br>(2.4%)    | 7,980 (2.1%)   | 1,408 (15.5%) | 8,413<br>(23.8%)  | 186 (15.7%) | 1,757 (8.4%)  | 812<br>(23.6%)   | 33 (24.8%) | 21<br>(25.6%) | 61 (18.9%)  | 1,097<br>(24.7%) | 23 (25.0%) |
| Malignant neoplastic disease                       | 334,738<br>(6.1%)    | 18,744 (5.0%)  | 2,029 (22.3%) | 13,700<br>(38.8%) | 217 (18.4%) | 3,079 (14.7%) | 1,046<br>(30.4%) | 36 (27.1%) | 23<br>(28.0%) | 65 (20.1%)  | 1,471<br>(33.2%) | 24 (26.1%) |
| Diabetes mellitus                                  | 405,227<br>(7.4%)    | 26,227 (7.0%)  | 2,739 (30.1%) | 10,497<br>(29.7%) | 348 (29.5%) | 4,646 (22.2%) | 1,052<br>(30.6%) | 44 (33.1%) | 29<br>(35.4%) | 136 (42.1%) | 1,584<br>(35.7%) | 39 (42.4%) |
| Obesity                                            | 849,916<br>(15.5%)   | 62,904 (16.7%) | 3,237 (35.6%) | 9,073<br>(25.7%)  | 390 (33.0%) | 7,124 (34.1%) | 902<br>(26.2%)   | 53 (39.8%) | 29<br>(35.4%) | 109 (33.7%) | 1,591<br>(35.9%) | 26 (28.3%) |
| Heart disease                                      | 573,769<br>(10.5%)   | 35,051 (9.3%)  | 3,780 (41.6%) | 19,130<br>(54.2%) | 535 (45.3%) | 5,995 (28.7%) | 1,947<br>(56.6%) | 79 (59.4%) | 45<br>(54.9%) | 169 (52.3%) | 2,638<br>(59.5%) | 56 (60.9%) |
| Hypertensive disorder                              | 925,838<br>(16.9%)   | 55,515 (14.8%) | 4,940 (54.3%) | 21,319<br>(60.4%) | 764 (64.7%) | 8,897 (42.5%) | 2,198<br>(63.9%) | 93 (69.9%) | 56<br>(68.3%) | 204 (63.2%) | 2,989<br>(67.4%) | 66 (71.7%) |
| Renal impairment                                   | 239,550<br>(4.4%)    | 14,295 (3.8%)  | 2,512 (27.6%) | 13,374<br>(37.9%) | 272 (23.0%) | 3,368 (16.1%) | 1,428<br>(41.5%) | 48 (36.1%) | 33<br>(40.2%) | 92 (28.5%)  | 1,959<br>(44.2%) | 37 (40.2%) |
| COPD                                               | 154,015<br>(2.8%)    | 8,323 (2.2%)   | 1,402 (15.4%) | 6,768<br>(19.2%)  | 122 (10.3%) | 1,926 (9.2%)  | 587<br>(17.1%)   | 17 (12.8%) | 12<br>(14.6%) | 52 (16.1%)  | 957<br>(21.6%)   | 21 (22.8%) |
| Dementia                                           | 54,963<br>(1.0%)     | 5,828 (1.5%)   | 583 (6.4%)    | 6,837<br>(19.4%)  | 99 (8.4%)   | 969 (4.6%)    | 1,113<br>(32.4%) | 8 (6.0%)   | 18<br>(22.0%) | 27 (8.4%)   | 704<br>(15.9%)   | 7 (7.6%)   |
| Smoking                                            | 1,116,778<br>(20.3%) | 64,926 (17.3%) | 1,985 (21.8%) | 8,610<br>(24.4%)  | 299 (25.3%) | 4,323 (20.7%) | 615<br>(17.9%)   | 31 (23.3%) | 17<br>(20.7%) | 85 (26.3%)  | 1,052<br>(23.7%) | 23 (25.0%) |
| Medication use (183 days prior to four days prior) |                      |                |               |                   |             |               |                  |            |               |             |                  |            |
| Non-steroidal anti-inflammatory drugs              | 940,465<br>(17.1%)   | 74,149 (19.7%) | 2,269 (25.0%) | 8,308<br>(23.5%)  | 303 (25.7%) | 5,130 (24.5%) | 879<br>(25.6%)   | 36 (27.1%) | 23<br>(28.0%) | 76 (23.5%)  | 1,099<br>(24.8%) | 24 (26.1%) |
| Cox2 inhibitors                                    | 22,207<br>(0.4%)     | 1,593 (0.4%)   | 49 (0.5%)     | 112<br>(0.3%)     | 18 (1.5%)   | 154 (0.7%)    | 19<br>(0.6%)     | <5         | 0 (0.0%)      | 0 (0.0%)    | 23<br>(0.5%)     | 0 (0.0%)   |
| Systemic corticosteroids                           | 207,880<br>(3.8%)    | 15,410 (4.1%)  | 796 (8.8%)    | 4,302<br>(12.2%)  | 106 (9.0%)  | 1,426 (6.8%)  | 401<br>(11.7%)   | 20 (15.0%) | 7 (8.5%)      | 26 (8.0%)   | 508<br>(11.4%)   | 9 (9.8%)   |
| Antithrombotic and anticoagulant therapies         | 65,631<br>(1.2%)     | 4,633 (1.2%)   | 412 (4.5%)    | 2,481<br>(7.0%)   | 59 (5.0%)   | 606 (2.9%)    | 219<br>(6.4%)    | 7 (5.3%)   | <5            | 13 (4.0%)   | 264<br>(5.9%)    | 7 (7.6%)   |
| Lipid modifying agents                             | 46,713<br>(0.9%)     | 2,879 (0.8%)   | 197 (2.2%)    | 1,119<br>(3.2%)   | 31 (2.6%)   | 384 (1.8%)    | 88<br>(2.6%)     | <5         | <5            | 7 (2.2%)    | 114<br>(2.6%)    | 0 (0.0%)   |
| Antineoplastic and immunomodulating agents         | 45,875<br>(0.8%)     | 3,992 (1.1%)   | 134 (1.5%)    | 911<br>(2.6%)     | 18 (1.5%)   | 249 (1.2%)    | 75<br>(2.2%)     | <5         | <5            | 0 (0.0%)    | 69<br>(1.6%)     | 0 (0.0%)   |
| Hormonal contraceptives for systemic use           | 44,664<br>(0.8%)     | 4,701 (1.2%)   | 73 (0.8%)     | 353<br>(1.0%)     | <5          | 137 (0.7%)    | 22<br>(0.6%)     | <5         | <5            | <5          | 22<br>(0.5%)     | 0 (0.0%)   |
| Tamoxifen                                          | 1,304<br>(0.0%)      | 75 (0.0%)      | <5            | 27<br>(0.1%)      | 0 (0.0%)    | 9 (0.0%)      | <5               | 0 (0.0%)   | 0 (0.0%)      | 0 (0.0%)    | <5               | 0 (0.0%)   |

|                                                   |                   |                 |               |                |             |                |               |             |            |             |               |            |
|---------------------------------------------------|-------------------|-----------------|---------------|----------------|-------------|----------------|---------------|-------------|------------|-------------|---------------|------------|
| Sex hormones and modulators of the genital system | 54,885 (1.0%)     | 5,520 (1.5%)    | 99 (1.1%)     | 385 (1.1%)     | 7 (0.6%)    | 197 (0.9%)     | 26 (0.8%)     | <5          | <5         | <5          | 27 (0.6%)     | <5         |
| Immunoglobulins                                   | 2,820 (0.1%)      | 218 (0.1%)      | 11 (0.1%)     | 0 (0.0%)       | 0 (0.0%)    | 14 (0.1%)      | 0 (0.0%)      | 0 (0.0%)    | 0 (0.0%)   | 0 (0.0%)    | 0 (0.0%)      | 0 (0.0%)   |
| Summary variables                                 | NA                | NA              | NA            | NA             | NA          | NA             | NA            | NA          | NA         | NA          | NA            | NA         |
| One or more condition of interest                 | 1,455,634 (26.5%) | 98,897 (26.3%)  | 6,305 (69.4%) | 27,943 (79.1%) | 807 (68.3%) | 12,270 (58.7%) | 2,710 (78.8%) | 108 (81.2%) | 73 (89.0%) | 248 (76.8%) | 3,711 (83.6%) | 77 (83.7%) |
| One or more medication of interest                | 1,071,907 (19.5%) | 84,541 (22.5%)  | 2,678 (29.5%) | 10,141 (28.7%) | 347 (29.4%) | 5,874 (28.1%)  | 1,062 (30.9%) | 43 (32.3%)  | 28 (34.1%) | 94 (29.1%)  | 1,354 (30.5%) | 31 (33.7%) |
| One or more condition/medication of interest      | 2,161,241 (39.4%) | 155,399 (41.3%) | 6,985 (76.8%) | 29,214 (82.7%) | 915 (77.5%) | 14,448 (69.1%) | 2,877 (83.6%) | 114 (85.7%) | 78 (95.1%) | 268 (83.0%) | 3,907 (88.1%) | 81 (88.0%) |

Supplementary Table 5. Patient characteristics of persons with a positive PCR test or a diagnosis of COVID-19 or hospitalised with COVID-19 before September 2020

|                                 | COVID-19 diagnosis or PCR positive test result |                   |                  |                  |                     | Hospitalised with COVID-19 |
|---------------------------------|------------------------------------------------|-------------------|------------------|------------------|---------------------|----------------------------|
|                                 | CPRD AURUM                                     | DA Germany        | IPCI             | LPD Italy        | SIDIAP CMBD-AH      | SIDIAP CMBD-AH             |
| N                               | 24,589                                         | 6,713             | 4,304            | 4,734            | 93,969              | 20,467                     |
| Earliest index date             | 01/03/2020                                     | 02/03/2020        | 01/03/2020       | 01/03/2020       | 01/03/2020          | 01/03/2020                 |
| Latest index date               | 31/08/2020                                     | 31/08/2020        | 31/08/2020       | 31/08/2020       | 31/08/2020          | 31/08/2020                 |
| Age                             | 58 [43 to 77]                                  | 44 [28 to 59]     | 52 [35 to 64]    | 54 [43 to 68]    | 49 [32 to 68]       | 66 [51 to 79]              |
| Age: Under 20                   | 186 (0.8%)                                     | 784 (11.7%)       | 222 (5.2%)       | 71 (1.5%)        | 8,085 (8.6%)        | 113 (0.6%)                 |
| Age: 20 to 29                   | 1,974 (8.0%)                                   | 1,003 (14.9%)     | 543 (12.6%)      | 374 (7.9%)       | 11,874 (12.6%)      | 692 (3.4%)                 |
| Age: 30 to 39                   | 2,684 (10.9%)                                  | 1,026 (15.3%)     | 534 (12.4%)      | 516 (10.9%)      | 12,930 (13.8%)      | 1,277 (6.2%)               |
| Age: 40 to 49                   | 3,569 (14.5%)                                  | 1,056 (15.7%)     | 681 (15.8%)      | 926 (19.6%)      | 15,649 (16.7%)      | 2,368 (11.6%)              |
| Age: 50 to 59                   | 4,643 (18.9%)                                  | 1,269 (18.9%)     | 887 (20.6%)      | 1,062 (22.4%)    | 14,034 (14.9%)      | 3,508 (17.1%)              |
| Age: 60 to 69                   | 3,216 (13.1%)                                  | 741 (11.0%)       | 605 (14.1%)      | 698 (14.7%)      | 9,214 (9.8%)        | 3,604 (17.6%)              |
| Age: 70 to 79                   | 2,843 (11.6%)                                  | 354 (5.3%)        | 409 (9.5%)       | 545 (11.5%)      | 8,177 (8.7%)        | 4,152 (20.3%)              |
| Age: 80 or older                | 5,474 (22.3%)                                  | 480 (7.2%)        | 423 (9.8%)       | 542 (11.4%)      | 14,006 (14.9%)      | 4,753 (23.2%)              |
| Sex: Male                       | 10,403 (42.3%)                                 | 3,057 (45.5%)     | 1,699 (39.5%)    | 1,975 (41.7%)    | 41,485 (44.1%)      | 11,009 (53.8%)             |
| Smoker                          | 5,403 (22.0%)                                  | 204 (3.0%)        | 521 (12.1%)      | 518 (10.9%)      | 17,385 (18.5%)      | 4,090 (20.0%)              |
| Years of prior observation time | 12.6 [4.5 to 25.0]                             | 5.8 [3.3 to 10.9] | 6.5 [4.9 to 9.1] | 8.5 [6.4 to 8.8] | 14.3 [14.2 to 14.5] | 14.2 [14.2 to 14.3]        |
| <i>Comorbidities</i>            |                                                |                   |                  |                  |                     |                            |

|                                                           |               |                  |             |                  |                |               |
|-----------------------------------------------------------|---------------|------------------|-------------|------------------|----------------|---------------|
| Autoimmune disease                                        | 783 (3.2%)    | 452 (6.7%)       | 85 (2.0%)   | 247 (5.2%)       | 2,018 (2.1%)   | 668 (3.3%)    |
| Antiphospholipid syndrome                                 | 23 (0.1%)     | 0 (0.0%)         | 0 (0.0%)    | 0 (0.0%)         | 57 (0.1%)      | 19 (0.1%)     |
| Thrombophilia                                             | 36 (0.1%)     | 21 (0.3%)        | 0 (0.0%)    | 0 (0.0%)         | 133 (0.1%)     | 41 (0.2%)     |
| Asthma                                                    | 3,073 (12.5%) | 807 (12.0%)      | 375 (8.7%)  | 449 (9.5%)       | 5,870 (6.2%)   | 1,435 (7.0%)  |
| Atrial fibrillation                                       | 1,820 (7.4%)  | 150 (2.2%)       | 191 (4.4%)  | 199 (4.2%)       | 5,302 (5.6%)   | 2,161 (10.6%) |
| Malignant neoplastic disease                              | 2,499 (10.2%) | 465 (6.9%)       | 422 (9.8%)  | 503 (10.6%)      | 8,777 (9.3%)   | 3,686 (18.0%) |
| Diabetes mellitus                                         | 4,186 (17.0%) | 757 (11.3%)      | 500 (11.6%) | 442 (9.3%)       | 11,725 (12.5%) | 4,727 (23.1%) |
| Obesity                                                   | 1,369 (5.6%)  | 815 (12.1%)      | 171 (4.0%)  | 50 (1.1%)        | 20,385 (21.7%) | 6,714 (32.8%) |
| Heart disease                                             | 4,595 (18.7%) | 1,530<br>(22.8%) | 557 (12.9%) | 966 (20.4%)      | 16,773 (17.8%) | 6,519 (31.9%) |
| Hypertensive disorder                                     | 6,846 (27.8%) | 1,884<br>(28.1%) | 827 (19.2%) | 1,576<br>(33.3%) | 24,436 (26.0%) | 9,189 (44.9%) |
| Renal impairment                                          | 3,717 (15.1%) | 315 (4.7%)       | 245 (5.7%)  | 181 (3.8%)       | 9,555 (10.2%)  | 3,922 (19.2%) |
| COPD                                                      | 1,404 (5.7%)  | 689 (10.3%)      | 166 (3.9%)  | 146 (3.1%)       | 4,638 (4.9%)   | 2,129 (10.4%) |
| Dementia                                                  | 2,121 (8.6%)  | 212 (3.2%)       | 72 (1.7%)   | 73 (1.5%)        | 6,267 (6.7%)   | 1,524 (7.4%)  |
| <i>Medication use (183 days prior to four days prior)</i> |               |                  |             |                  |                |               |
| Non-steroidal anti-inflammatory drugs                     | 808 (3.3%)    | 1,137<br>(16.9%) | 441 (10.2%) | 1,214<br>(25.6%) | 18,752 (20.0%) | 4,453 (21.8%) |
| Cox2 inhibitors                                           | 19 (0.1%)     | 80 (1.2%)        | 34 (0.8%)   | 95 (2.0%)        | 598 (0.6%)     | 204 (1.0%)    |
| Systemic corticosteroids                                  | 1,157 (4.7%)  | 171 (2.5%)       | 310 (7.2%)  | 458 (9.7%)       | 3,748 (4.0%)   | 1,361 (6.6%)  |
| Antithrombotic and anticoagulant therapies                | 997 (4.1%)    | 321 (4.8%)       | 261 (6.1%)  | 522 (11.0%)      | 3,838 (4.1%)   | 1,617 (7.9%)  |
| Lipid modifying agents                                    | 1,359 (5.5%)  | 308 (4.6%)       | 256 (5.9%)  | 464 (9.8%)       | 3,056 (3.3%)   | 1,329 (6.5%)  |
| Antineoplastic and immunomodulating agents                | 232 (0.9%)    | 44 (0.7%)        | 218 (5.1%)  | 98 (2.1%)        | 1,208 (1.3%)   | 345 (1.7%)    |
| Hormonal contraceptives for systemic use                  | 361 (1.5%)    | 82 (1.2%)        | 186 (4.3%)  | 63 (1.3%)        | 1,407 (1.5%)   | 154 (0.8%)    |
| Tamoxifen                                                 | 9 (0.0%)      | <5               | <5          | <5               | 32 (0.0%)      | 11 (0.1%)     |
| Sex hormones and modulators of the genital system         | 655 (2.7%)    | 102 (1.5%)       | 244 (5.7%)  | 144 (3.0%)       | 1,731 (1.8%)   | 223 (1.1%)    |
| Immunoglobulins                                           | 0 (0.0%)      | <5               | 0 (0.0%)    | 0 (0.0%)         | 60 (0.1%)      | 23 (0.1%)     |
| <i>Summary variables</i>                                  |               |                  |             |                  |                |               |

|                                               |                   |                  |                  |                  |                |                |
|-----------------------------------------------|-------------------|------------------|------------------|------------------|----------------|----------------|
| One or more condition of interest             | 9,457 (38.5%)     | 2,051<br>(30.6%) | 1,189<br>(27.6%) | 1,258<br>(26.6%) | 36,607 (39.0%) | 12,562 (61.4%) |
| One or more medication of interest            | 2,479 (10.1%)     | 1,346<br>(20.1%) | 884 (20.5%)      | 1,450<br>(30.6%) | 22,541 (24.0%) | 5,560 (27.2%)  |
| One or more condition/ medication of interest | 10,918<br>(44.4%) | 2,870<br>(42.8%) | 1,761<br>(40.9%) | 2,223<br>(47.0%) | 49,874 (53.1%) | 14,698 (71.8%) |



Supplementary Figure 2. Cumulative incidence of VTE, ATE and death among people hospitalised with COVID-19, stratified by age and sex. Estimates (solid lines) with 95% confidence intervals (dashed lines).

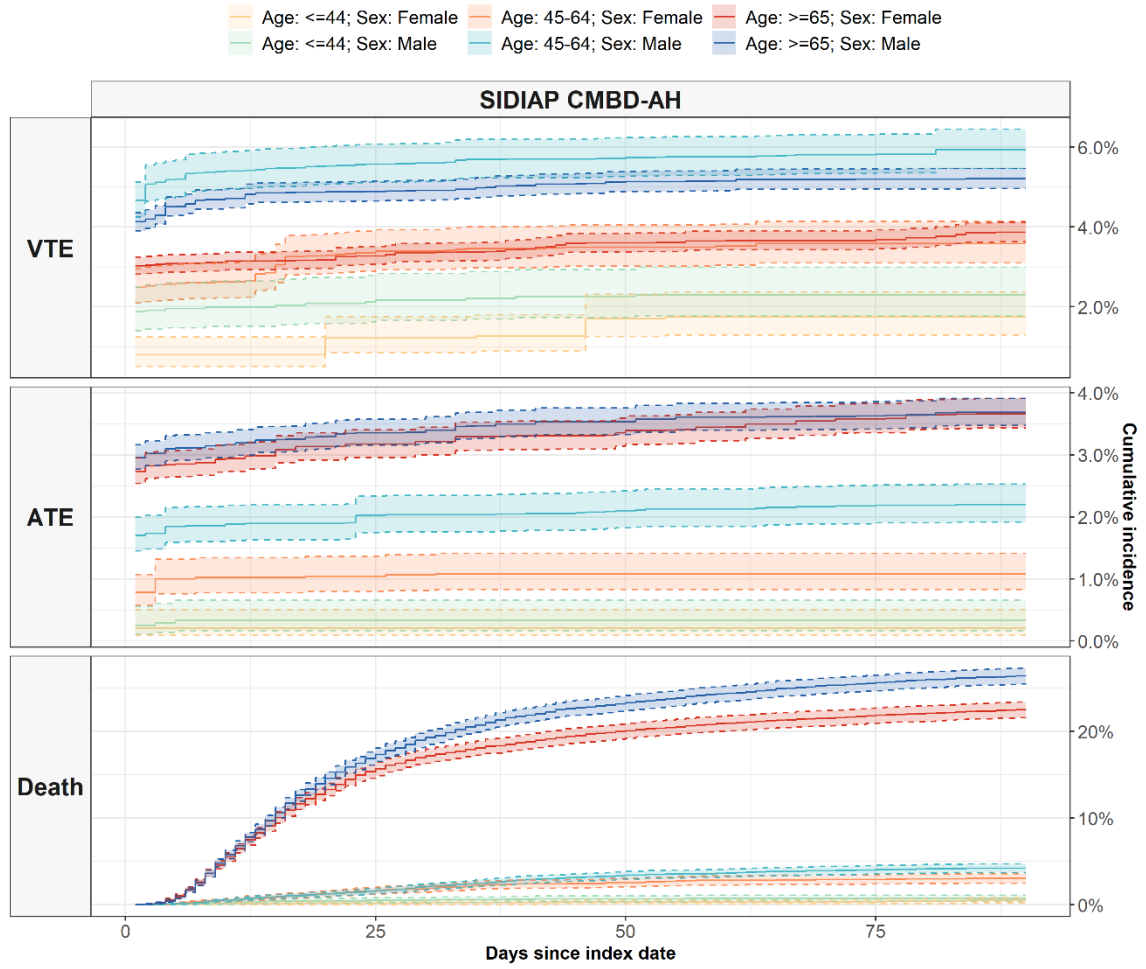

Supplementary Figure 3. Incidence of outcome events stratified by time period

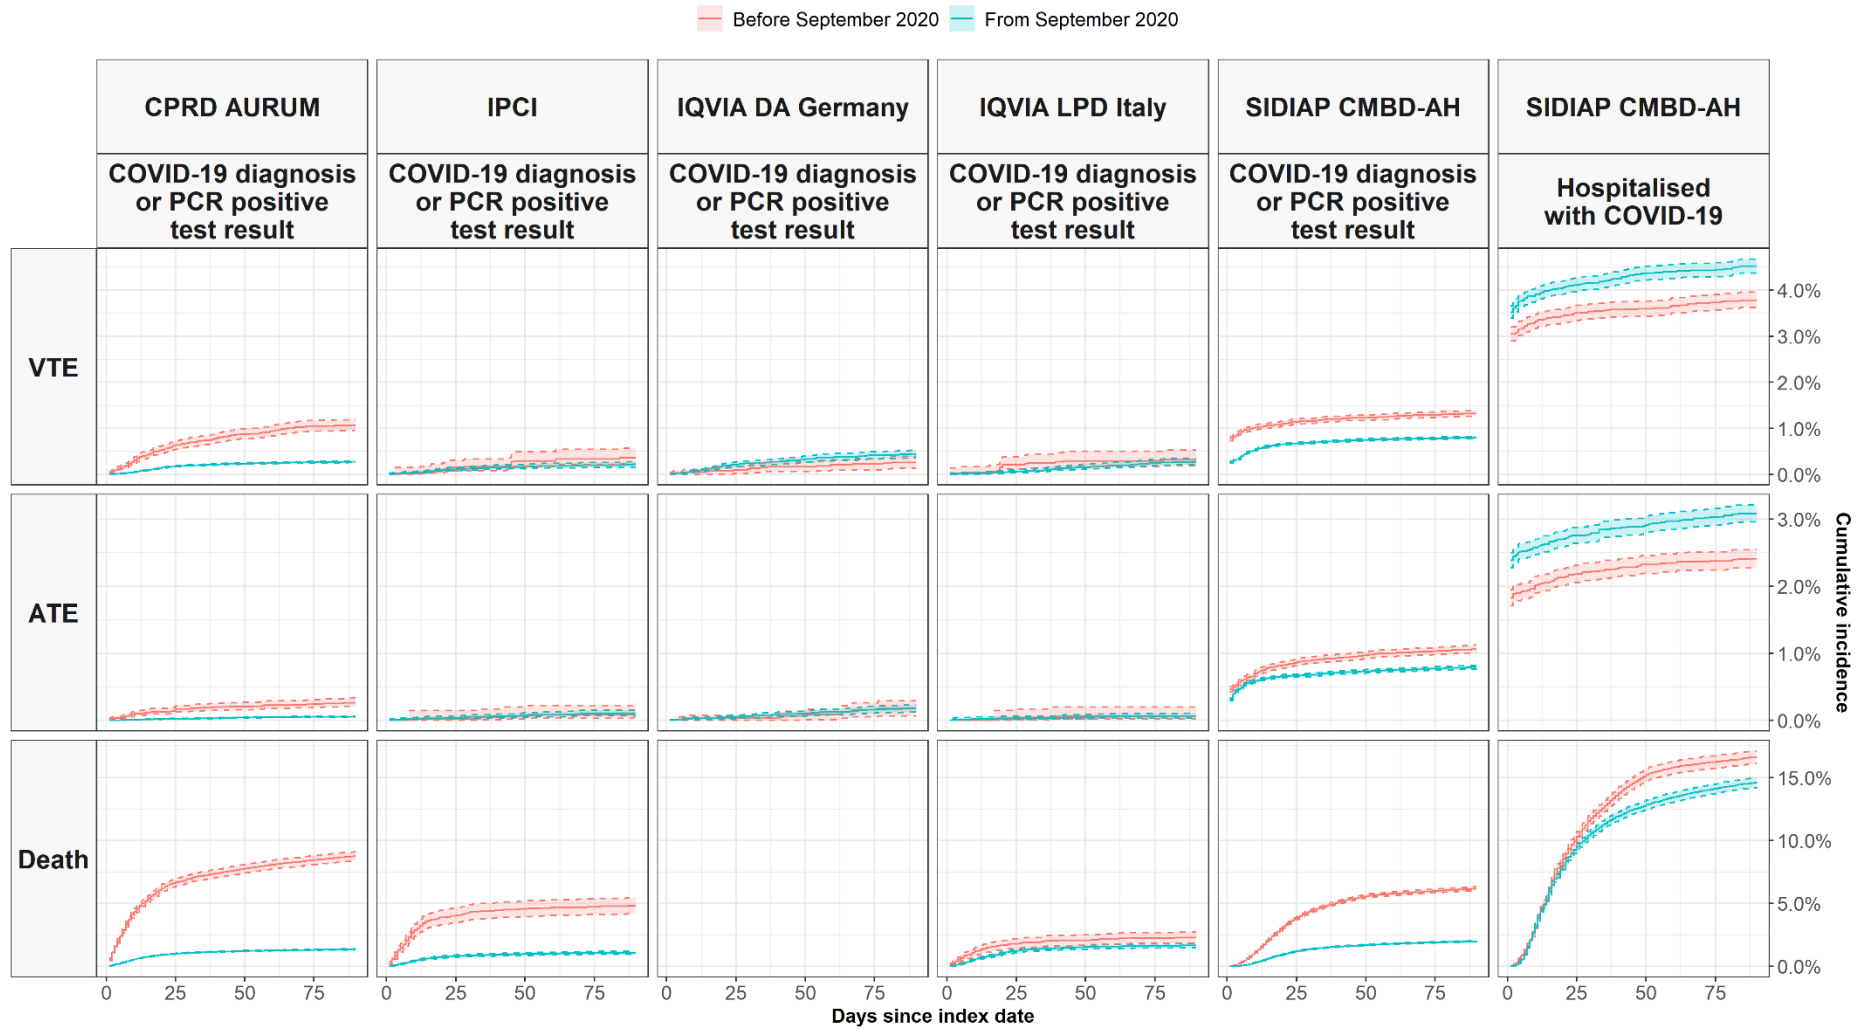

Supplementary Figure 4. Incidence of outcomes stratified by definition of COVID-19 (where the broad diagnosis definition included a wider set of diagnostic codes, such as “suspected COVID-19”).

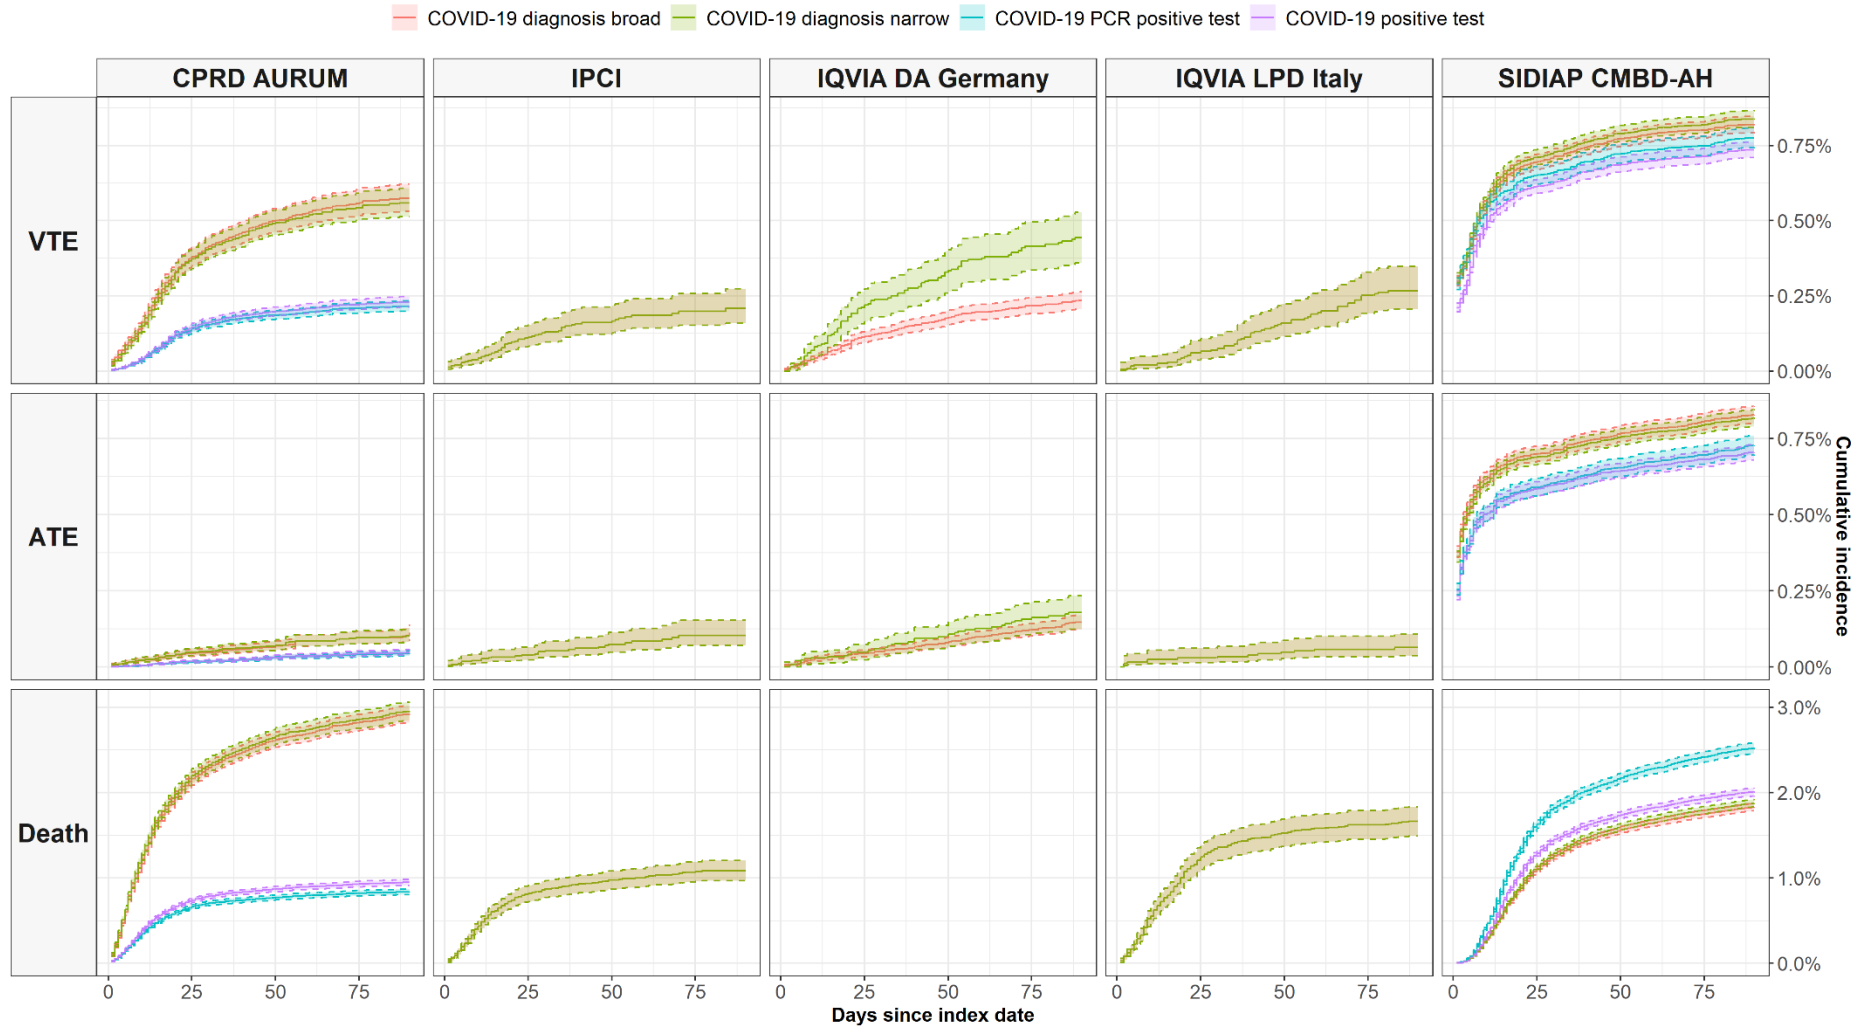

Supplementary Figure 5. Incidence of outcomes by whether year of prior history was required (NB estimates are overlapping)

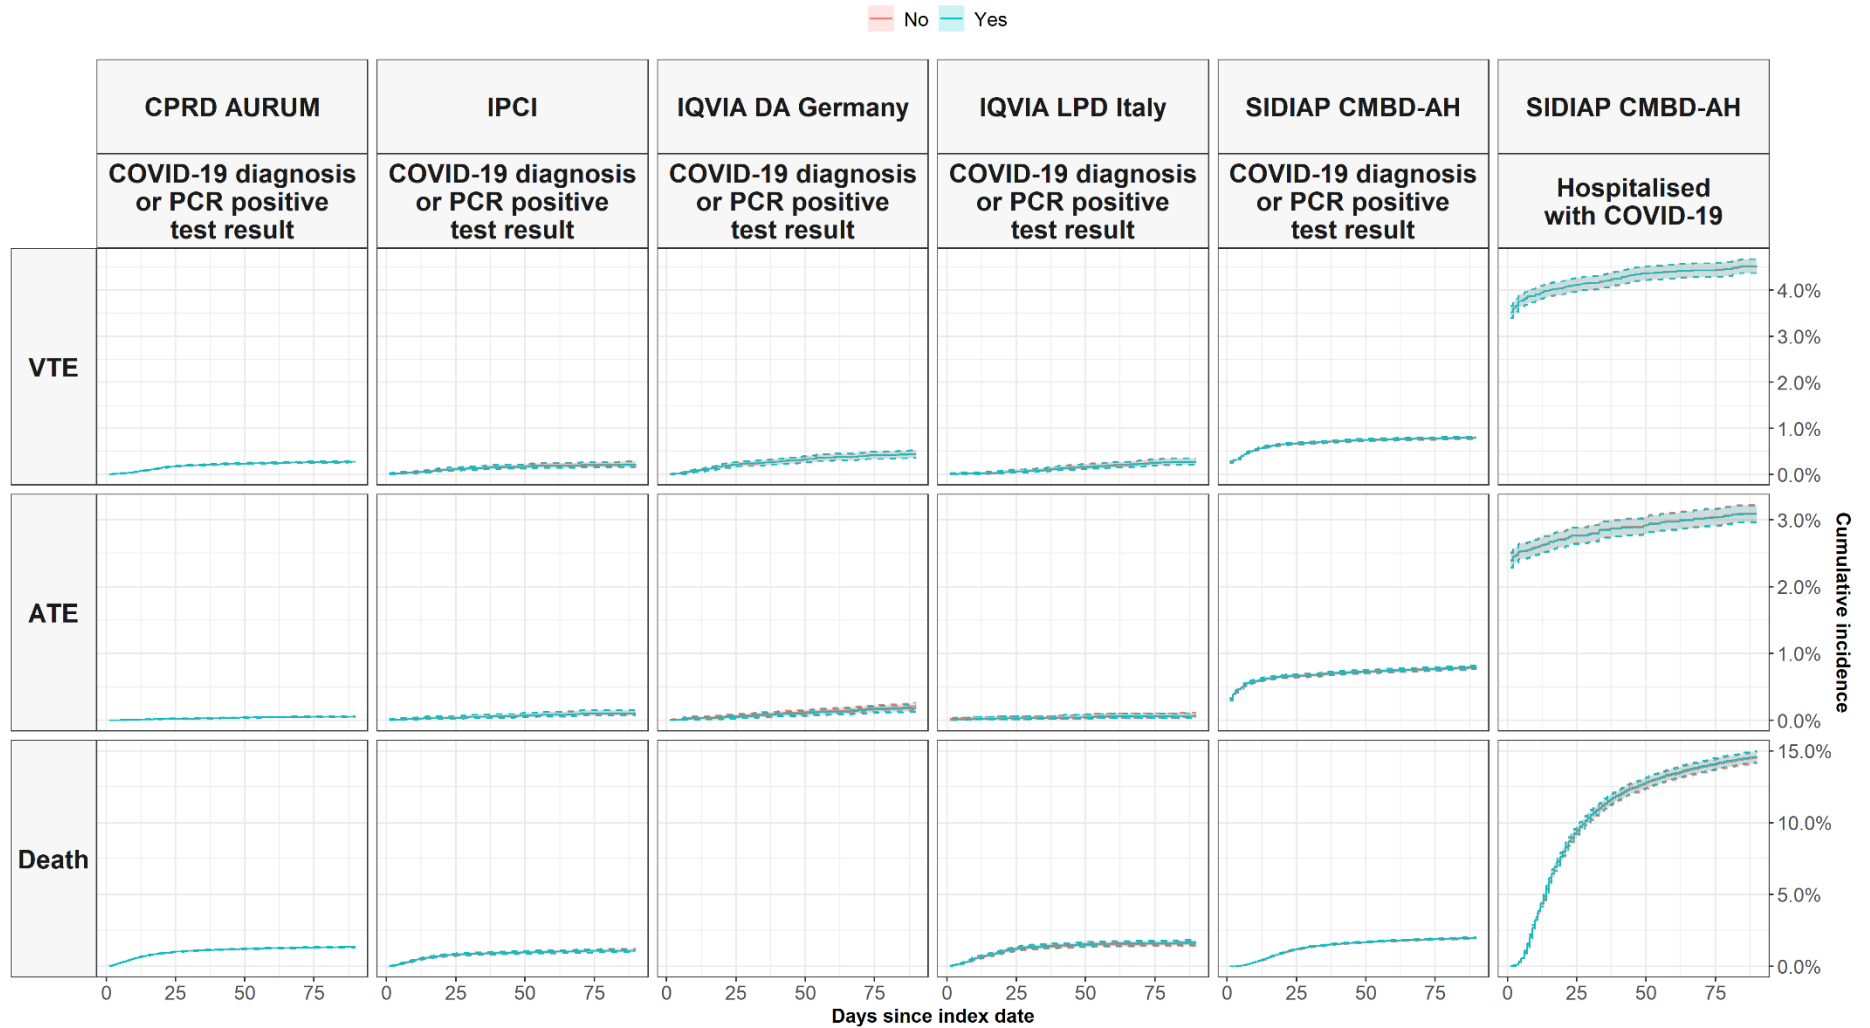

Supplement: mmc1.pdf [file mmc1.pdf]
